# Supplementary material for: Iron-mediated deuterium addition cascade cyano insertion/cyclization of N-arylacrylamides to access deuterium-labelled phenanthridines
Source: Royal Society of Chemistry journal article supplement (doi:10.1039/d0ob01178a), 2020-01-01

## Electronic Supplementary Information

### **Iron-mediated deuterium addition cascade cyano insertion/cyclization of *N*-arylacrylamides to access deuterium-labelled phenanthridines**

Lei Ji, Weijin Gu, Ping Liu\* and Peipei Sun\*

*School of Chemistry and Materials Science, Jiangsu Provincial Key Laboratory of Material Cycle  
Processes and Pollution Control, Jiangsu Collaborative Innovation Center of Biomedical Functional  
Materials, Nanjing Normal University, Nanjing 210023, China*

[pingliu@njnu.edu.cn](mailto:pingliu@njnu.edu.cn); [sunpeipei@njnu.edu.cn](mailto:sunpeipei@njnu.edu.cn)

#### **Contents**

|                                                                                 |        |
|---------------------------------------------------------------------------------|--------|
| 1 Mechanistic studies.....                                                      | S2–S3  |
| 2 <sup>1</sup> H and <sup>13</sup> C NMR spectra of the products <b>3</b> ..... | S4–S27 |

## 1 Mechanistic studies

### Free radical-trapping experiment

To a sealed tube were added *N*-(2-cyano-[1,1'-biphenyl]-3-yl)-*N*-methylmethacrylamide (**1a**, 0.2 mmol, 55.3 mg, 1.0 equiv.),  $\text{Fe}(\text{NO}_3)_3 \cdot 9\text{H}_2\text{O}$  (0.8 mmol, 323.2 mg, 4.0 equiv.), TEMPO (0.8 mmol, 125.0 mg, 4.0 equiv.),  $\text{CH}_3\text{CN}$  (2 mL), MeOH (2 mL) and  $\text{NaBD}_4$  (0.4 mmol, 16.7 mg, 2.0 equiv.). The resulting mixture was stirred at room temperature for 15 min. After the reaction was stopped, no desired product **3aa** was detected by TLC and LC-MS, indicating that the reaction was completely inhibited. Meanwhile, a deuterium radical trapping product **5** was detected by LC-MS analysis of the reaction solution.

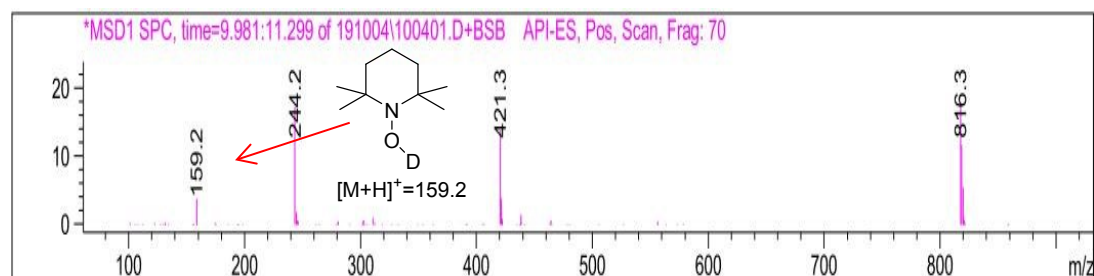

### The reaction of **1a** with $\text{NaBD}_4$ and $\text{NaBH}_4$

The reaction of **1a** (0.2 mmol, 55.3 mg, 1 equiv.) with  $\text{NaBD}_4$  (0.2 mmol, 8.4 mg, 1.0 equiv.) and  $\text{NaBH}_4$  (0.2 mmol, 7.6 mg, 1.0 equiv.) was conducted under standard conditions, and the ratio of the products **3aa** and **4aa** was 1 : 1.04, indicating that generation and introduction of deuterium atom may not be the rate-determining step.

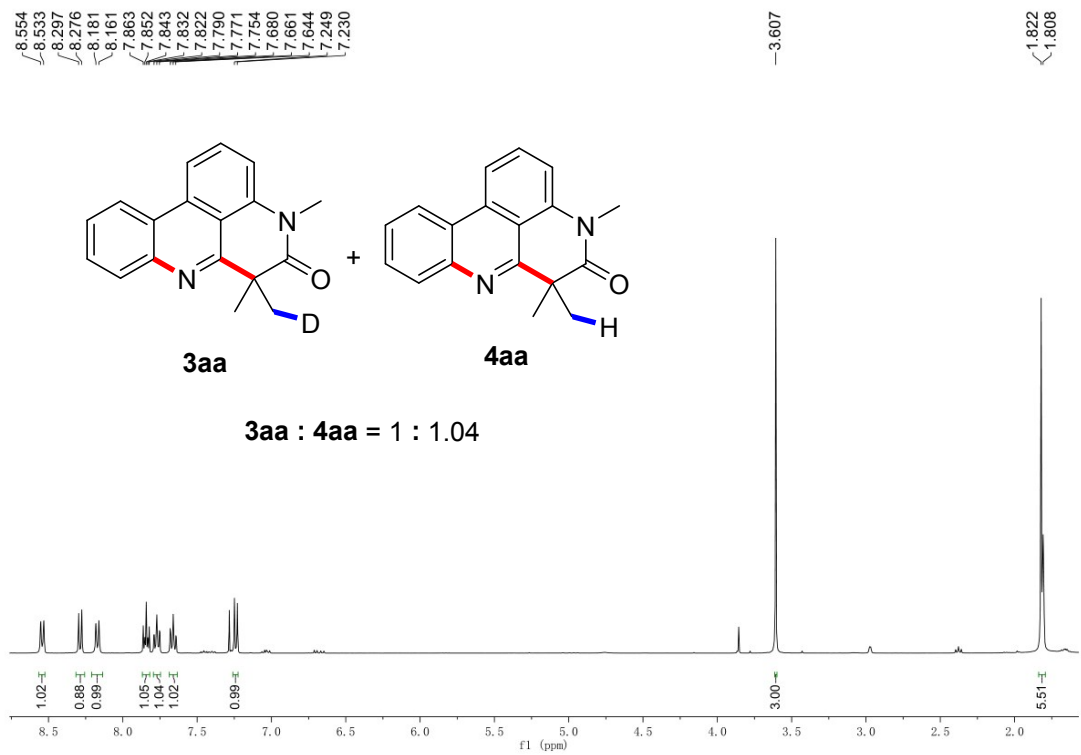

## 2 <sup>1</sup>H and <sup>13</sup>C NMR spectra of the products 3

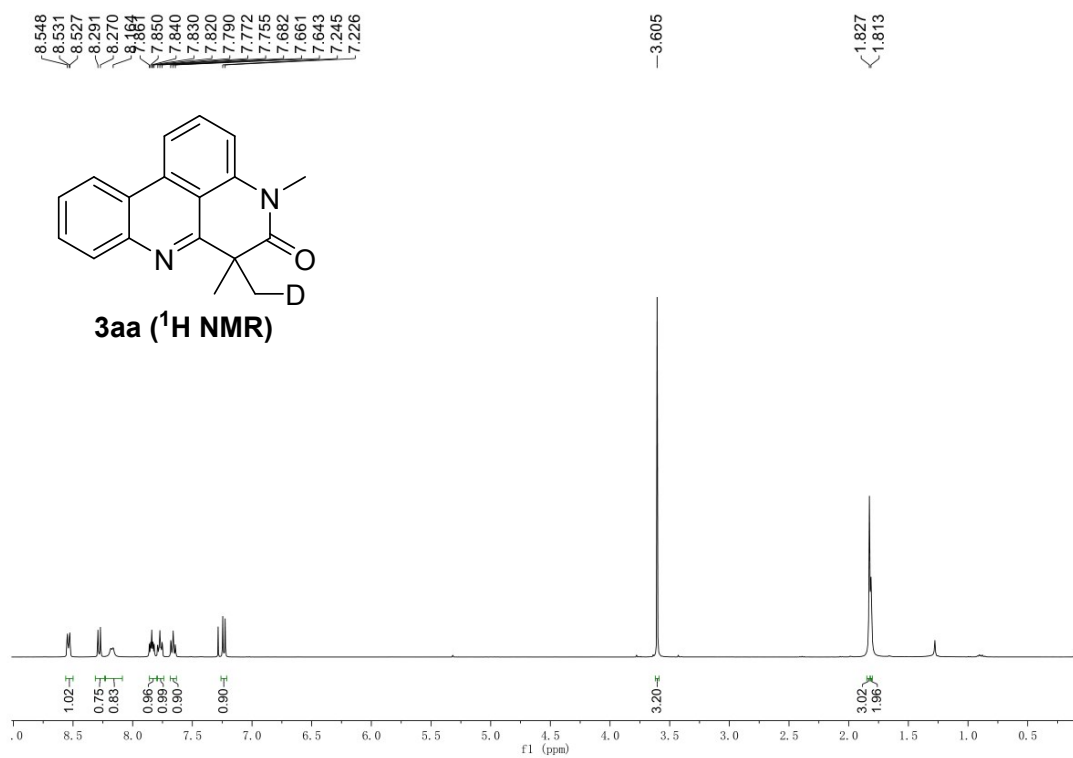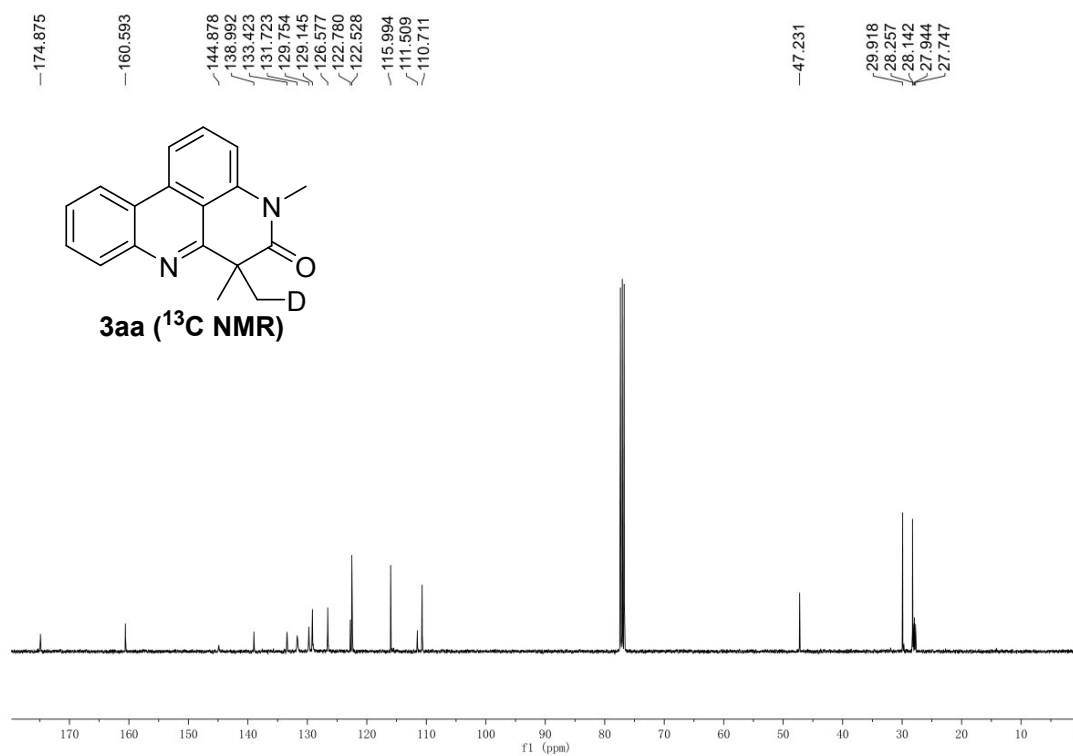

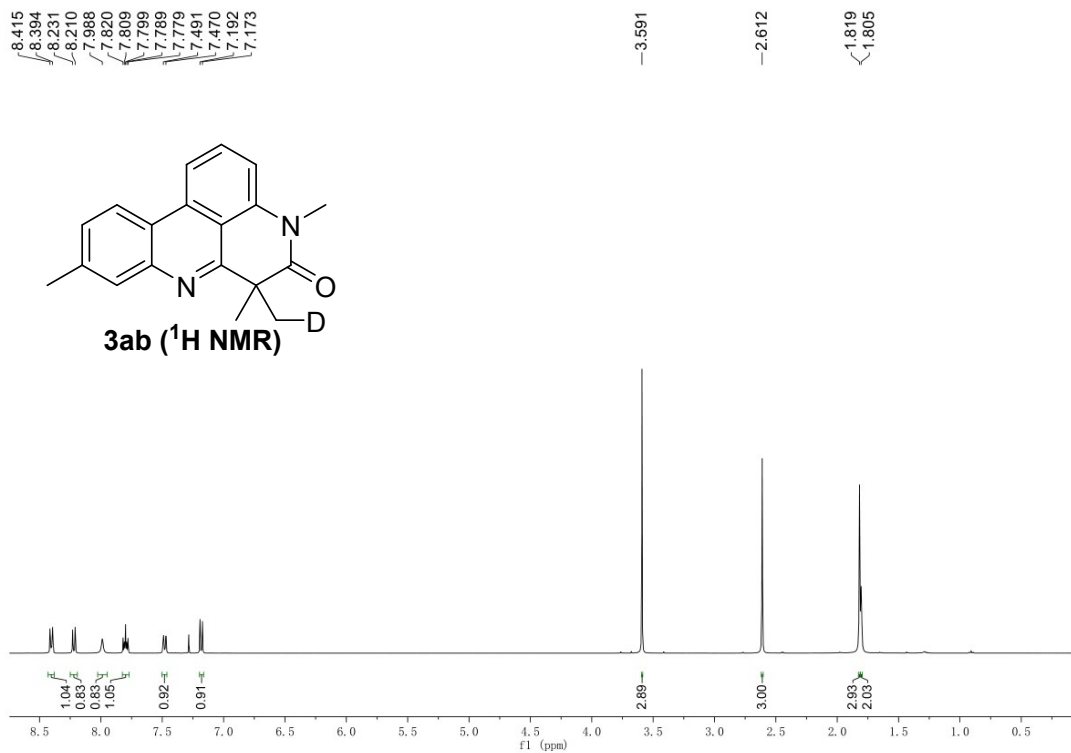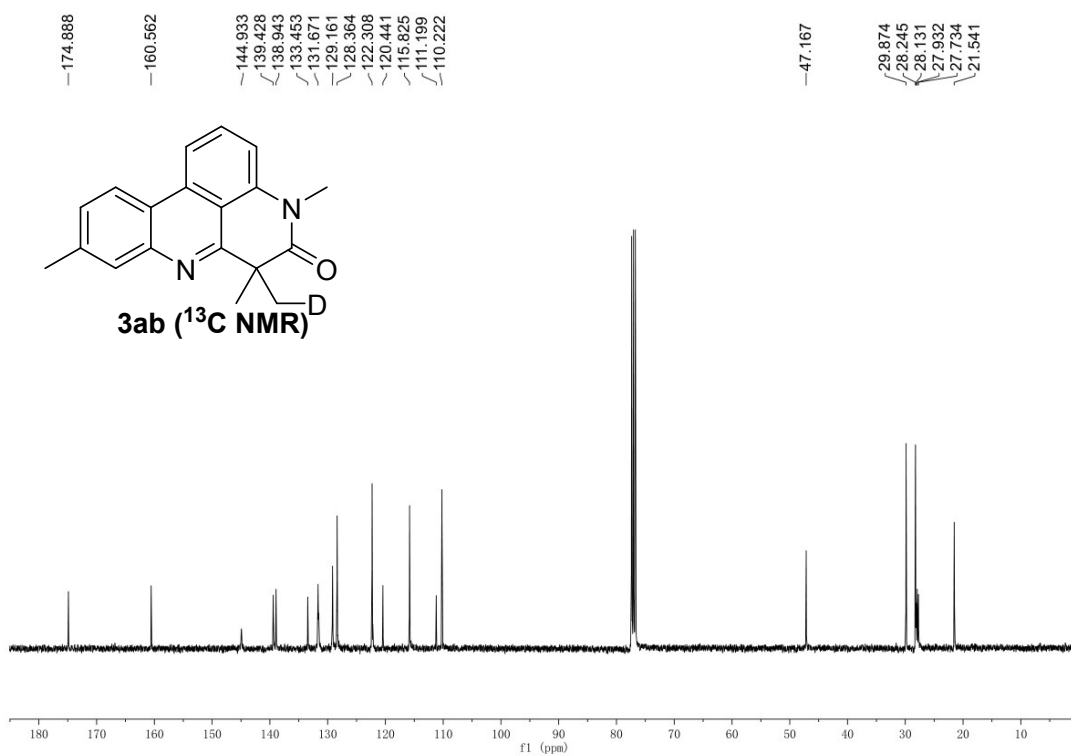

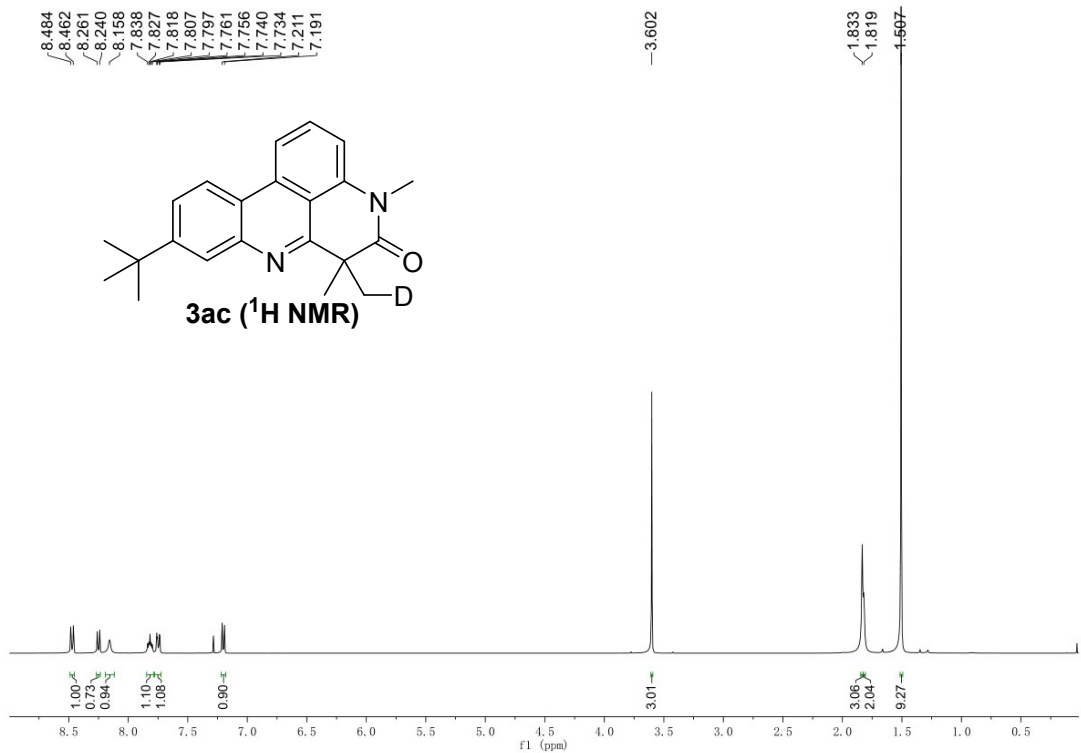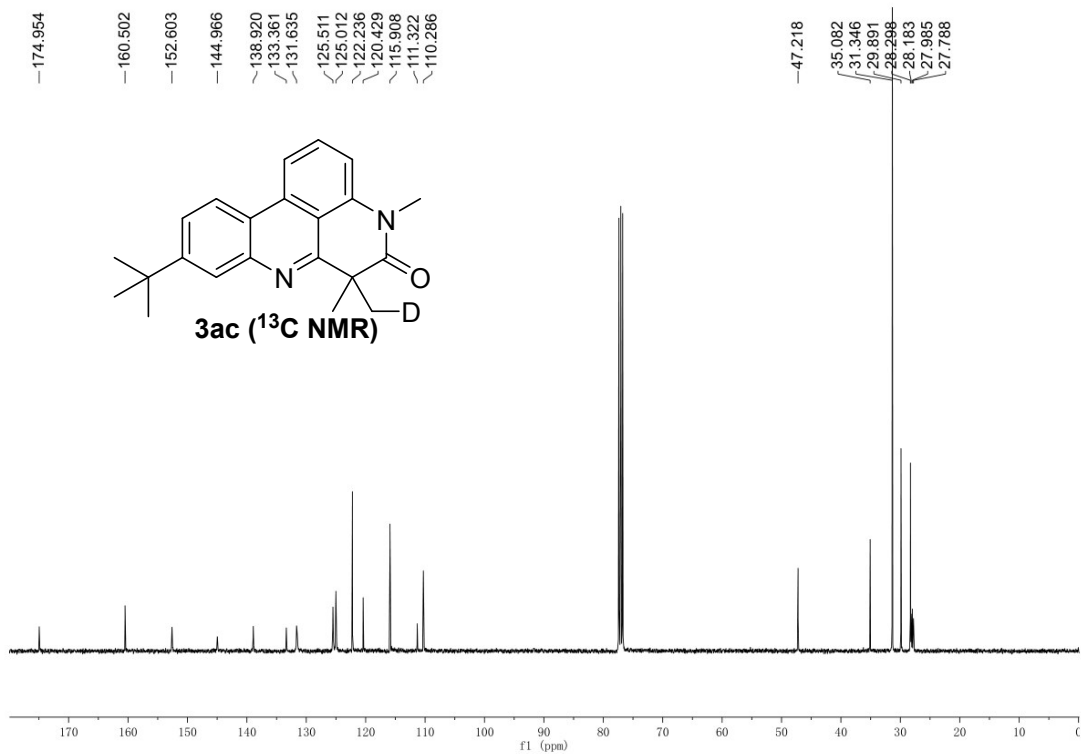

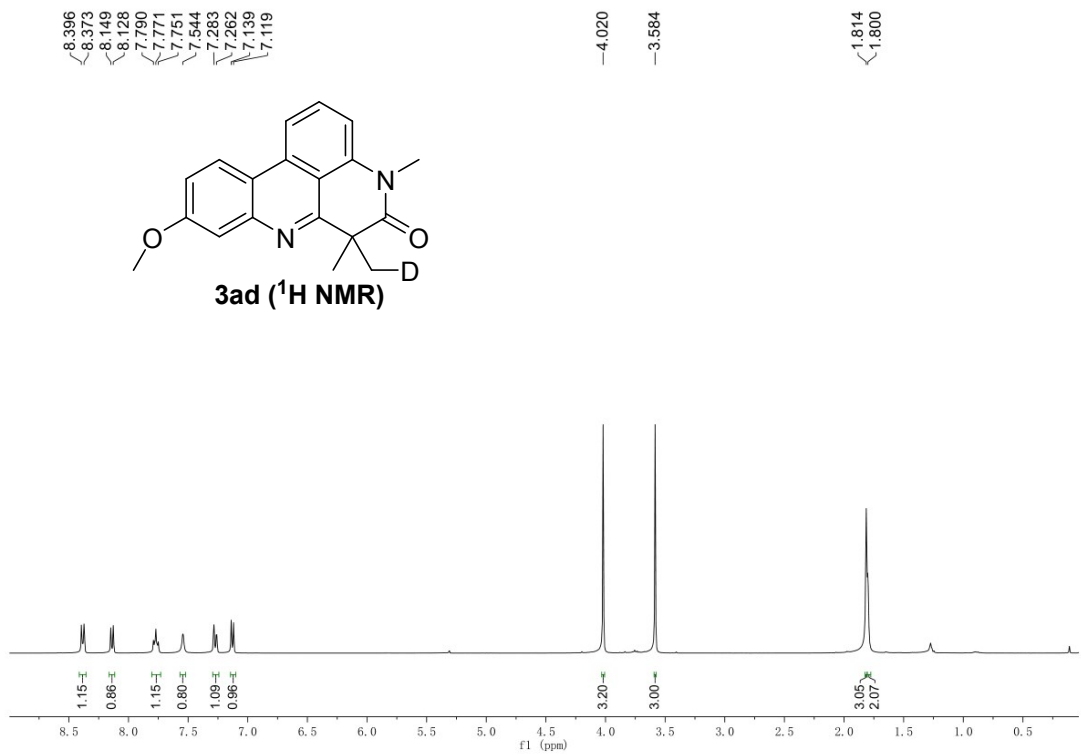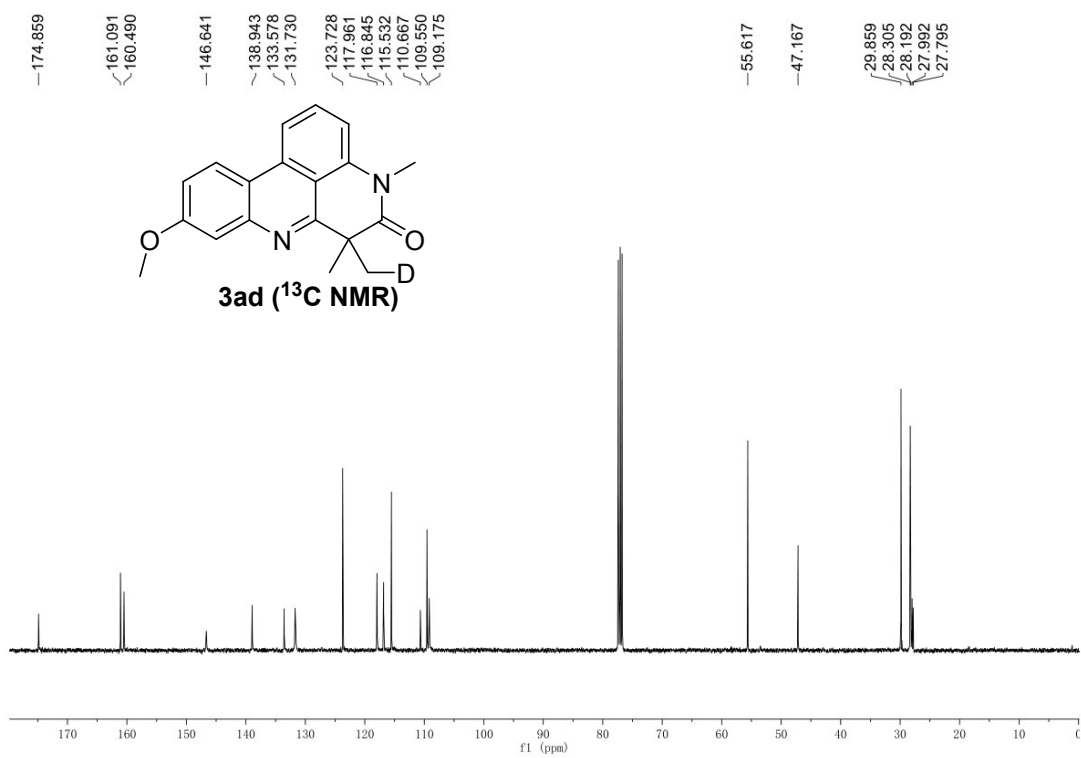

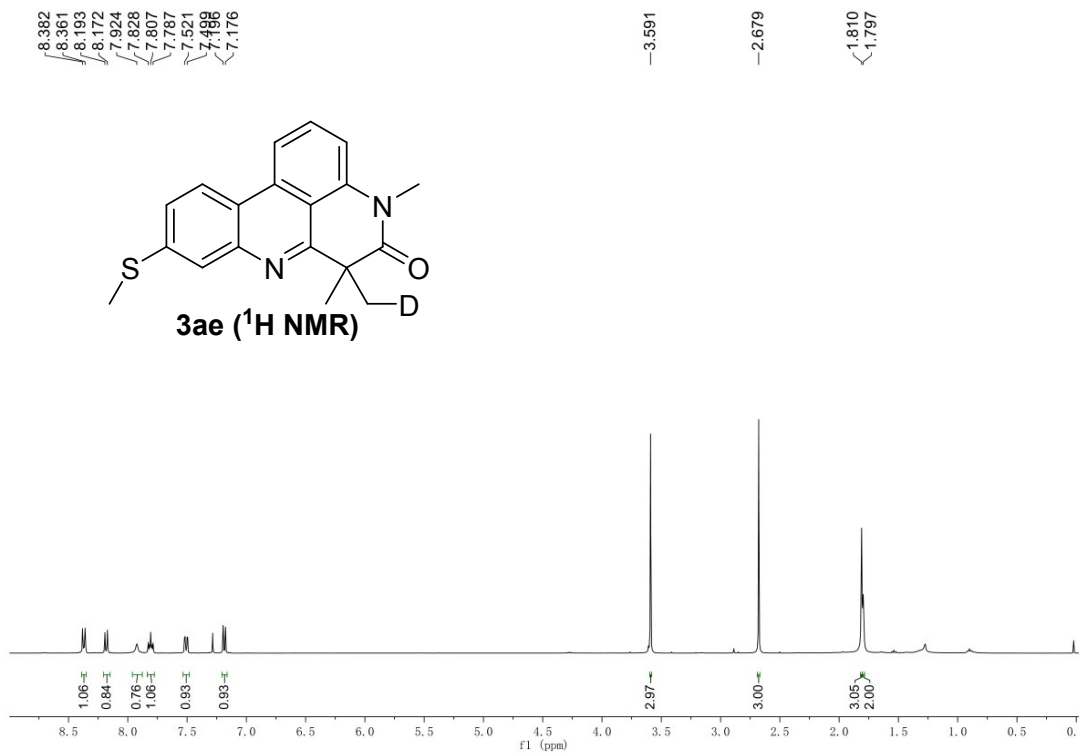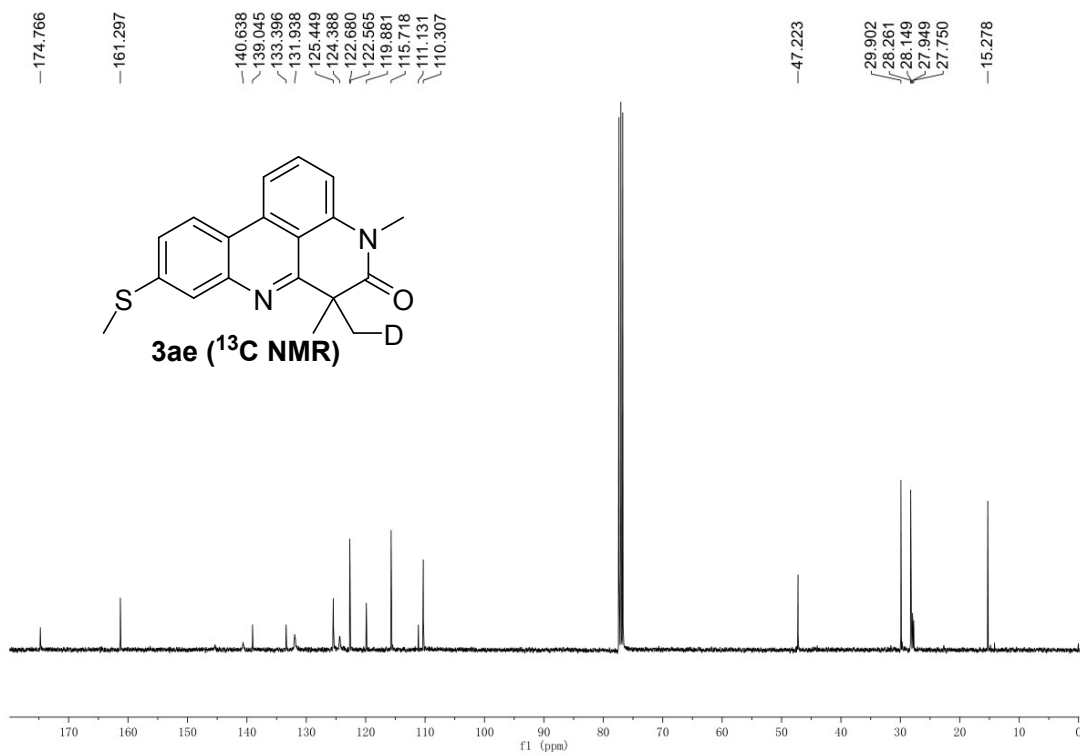



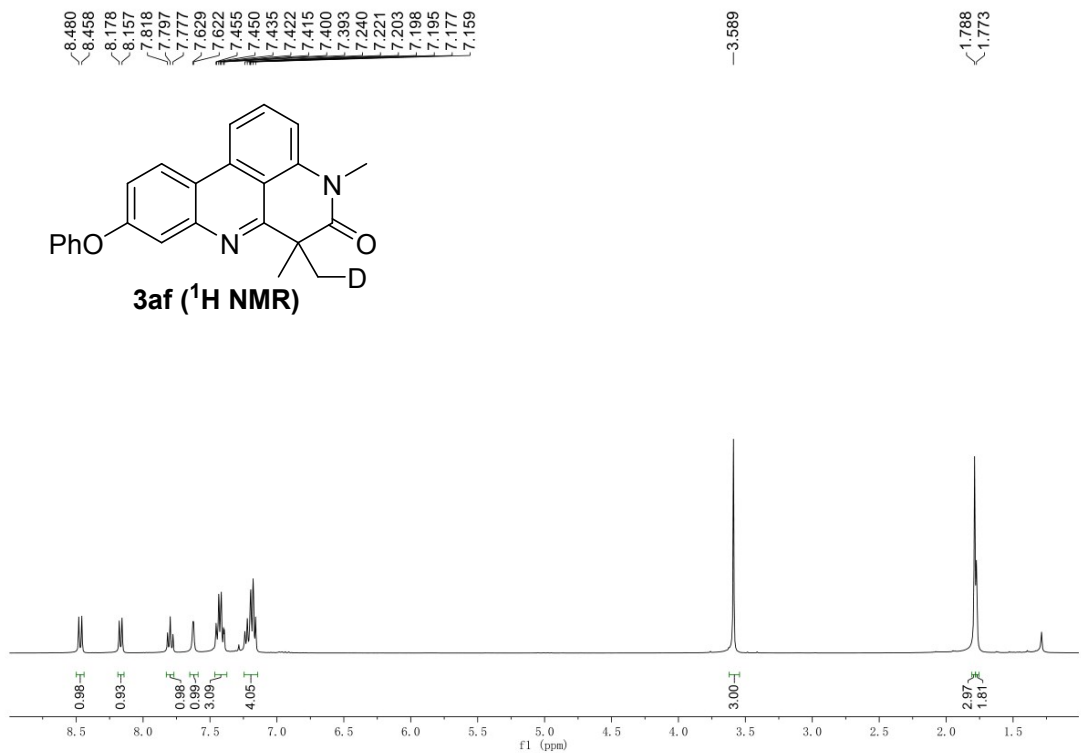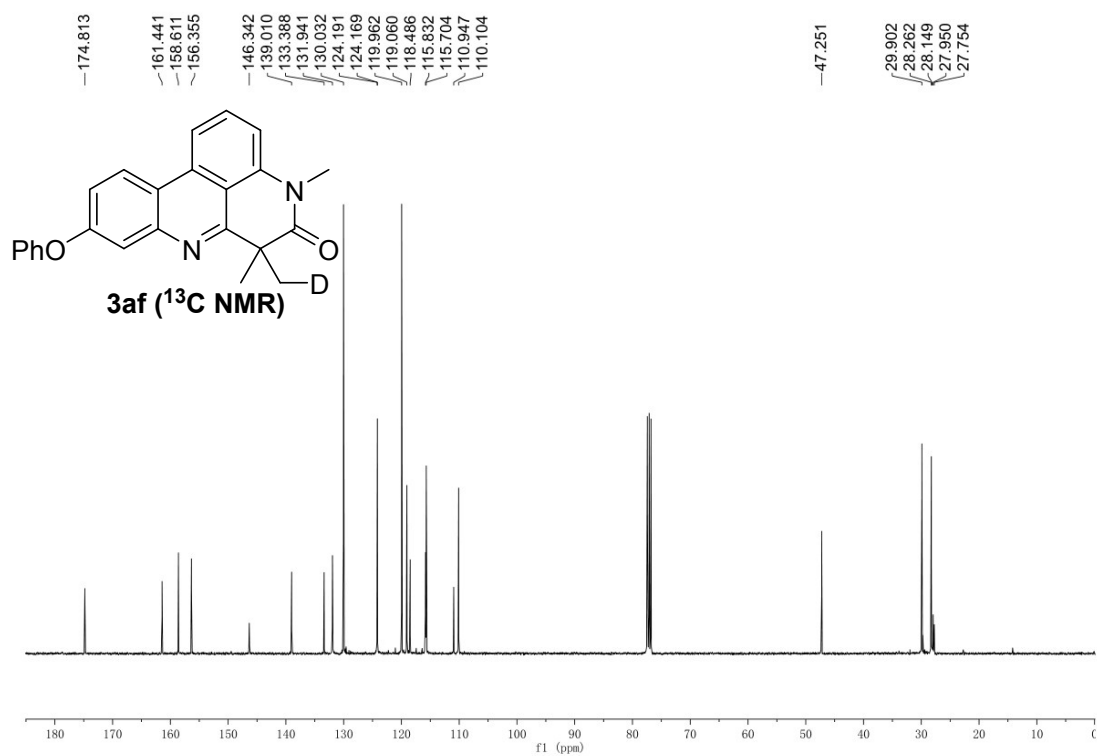

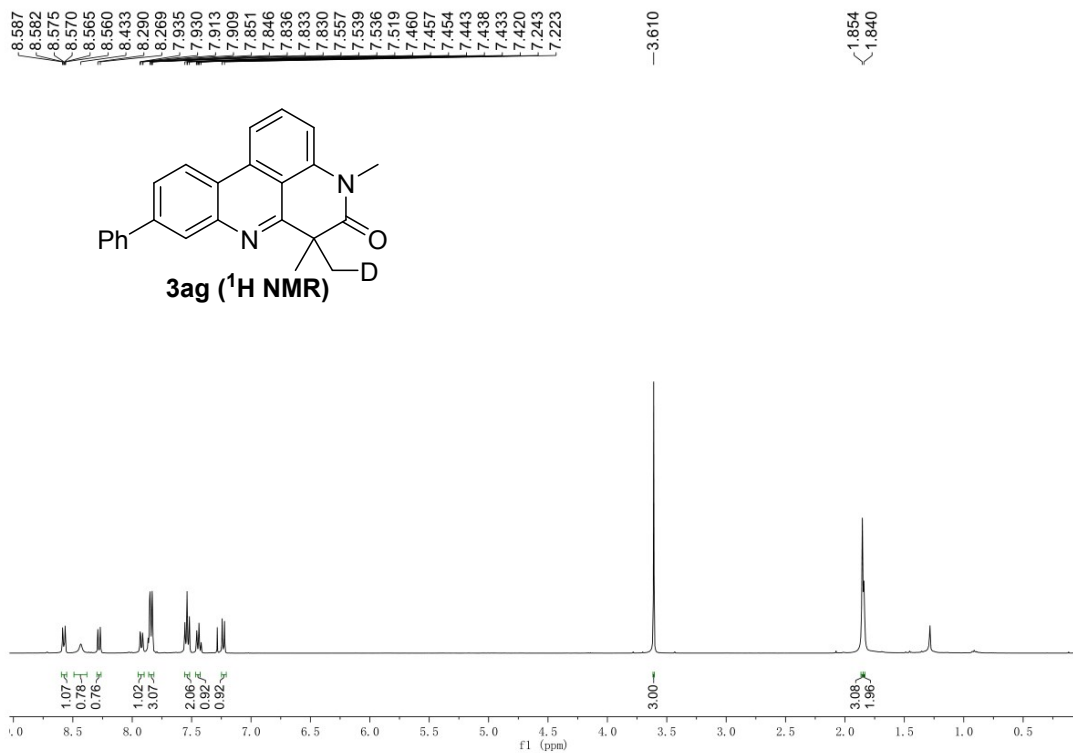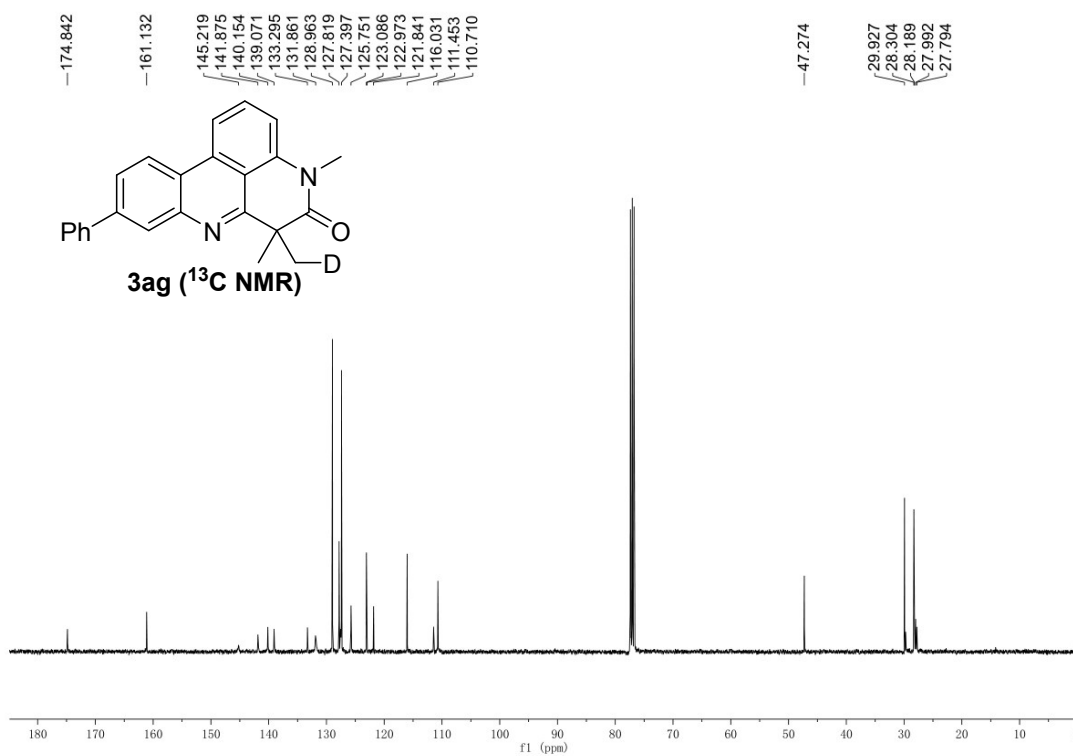

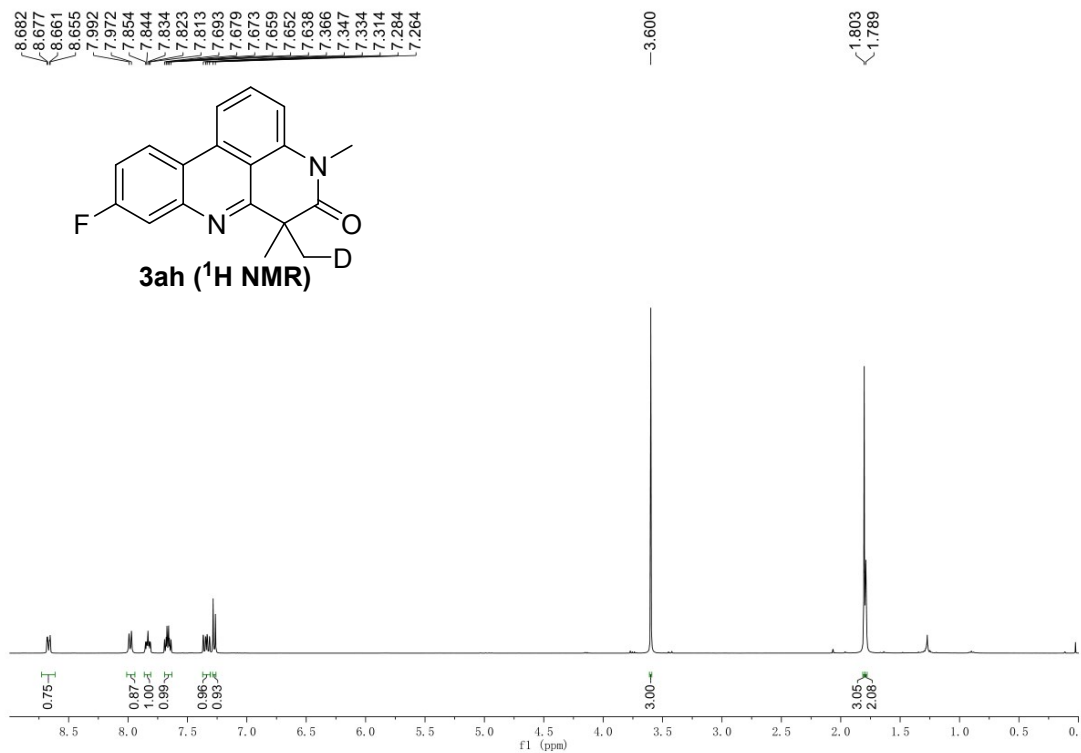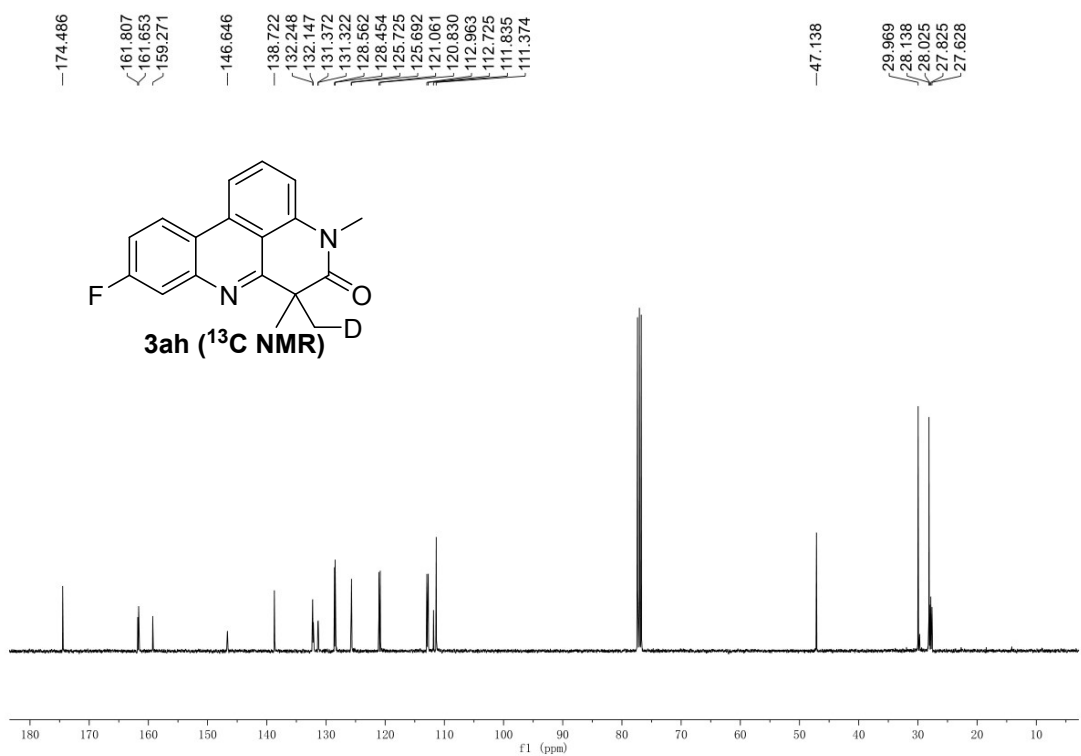

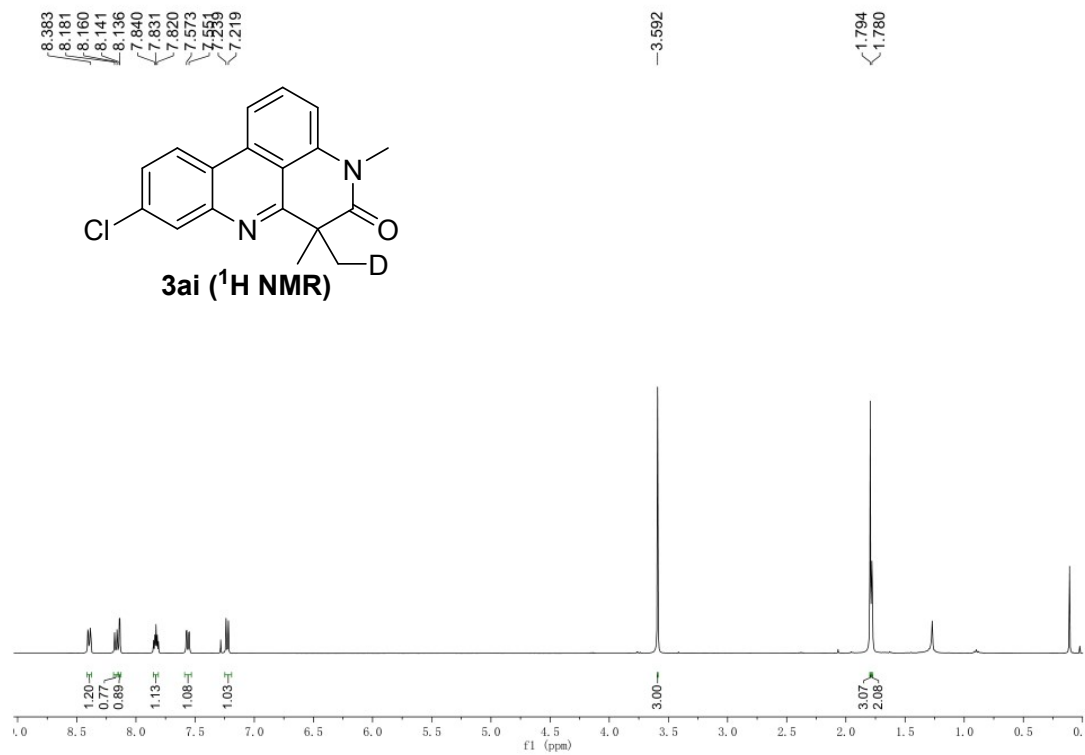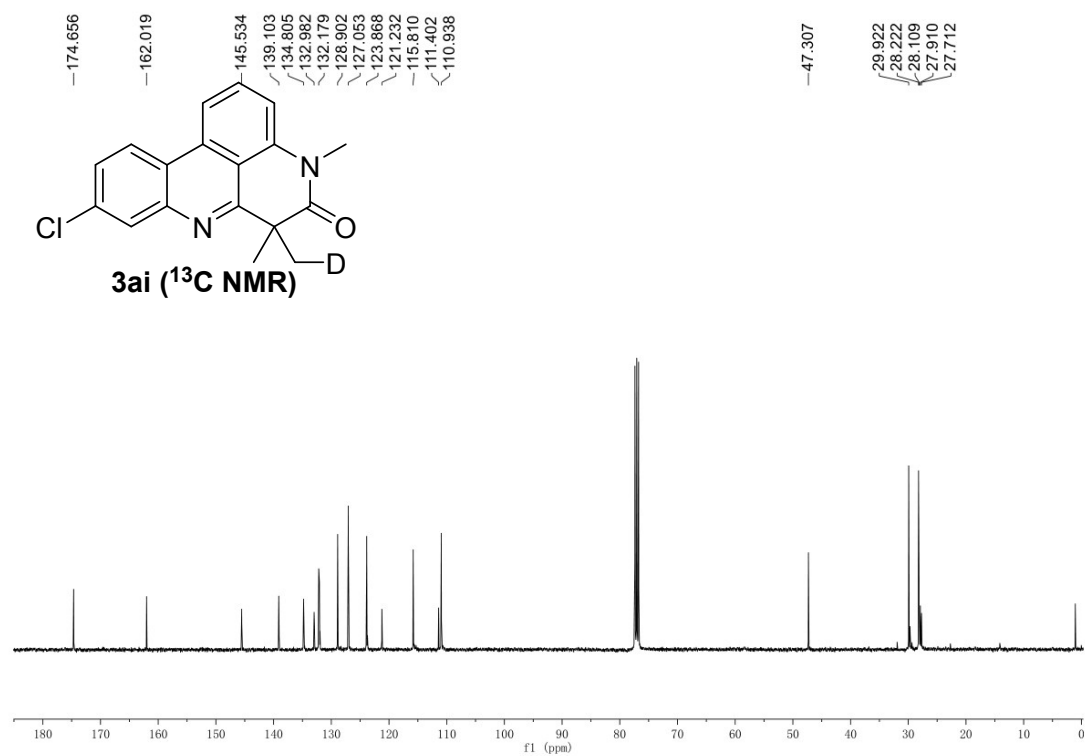

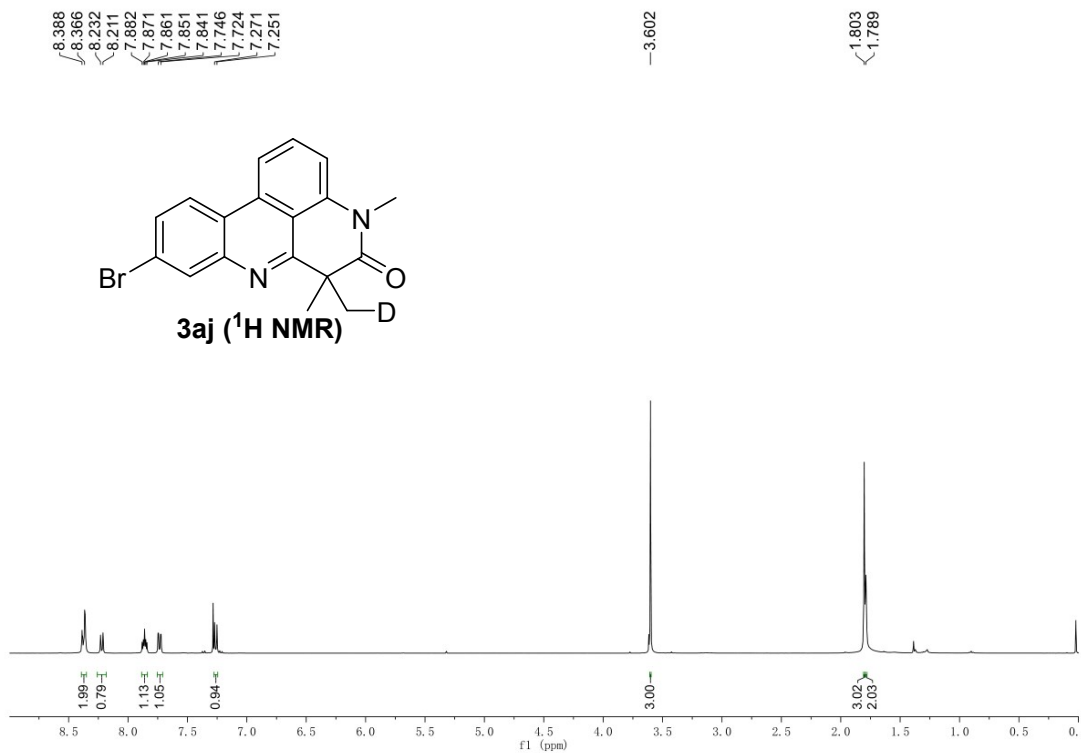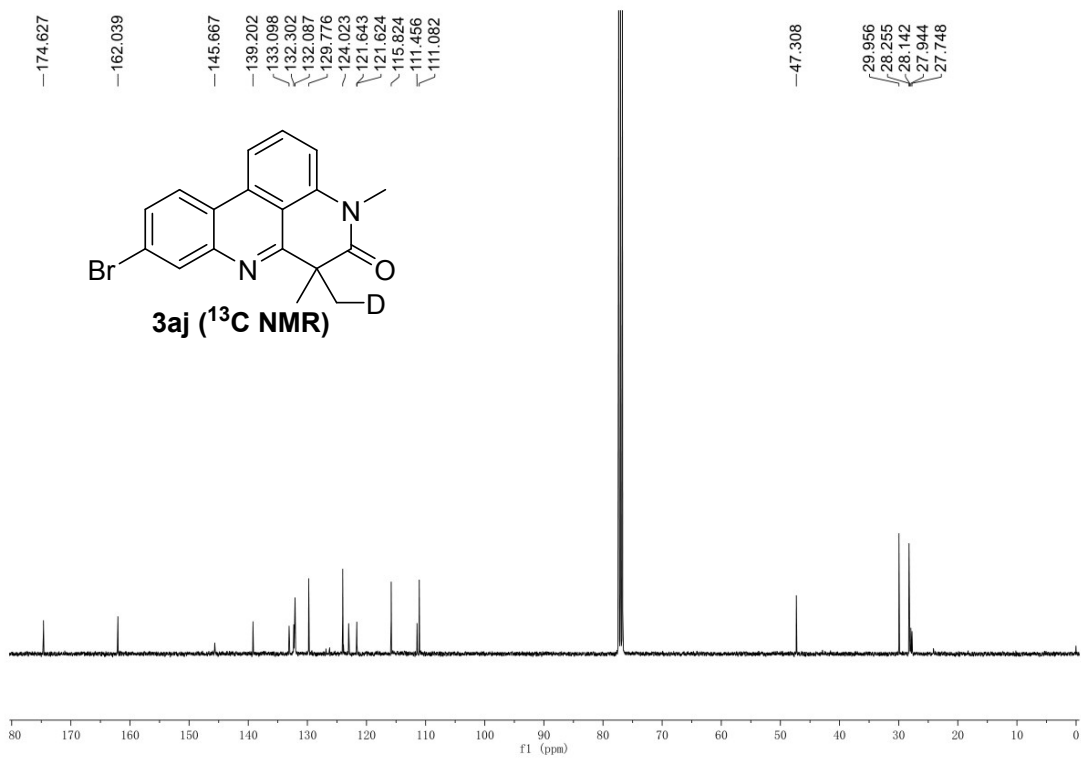

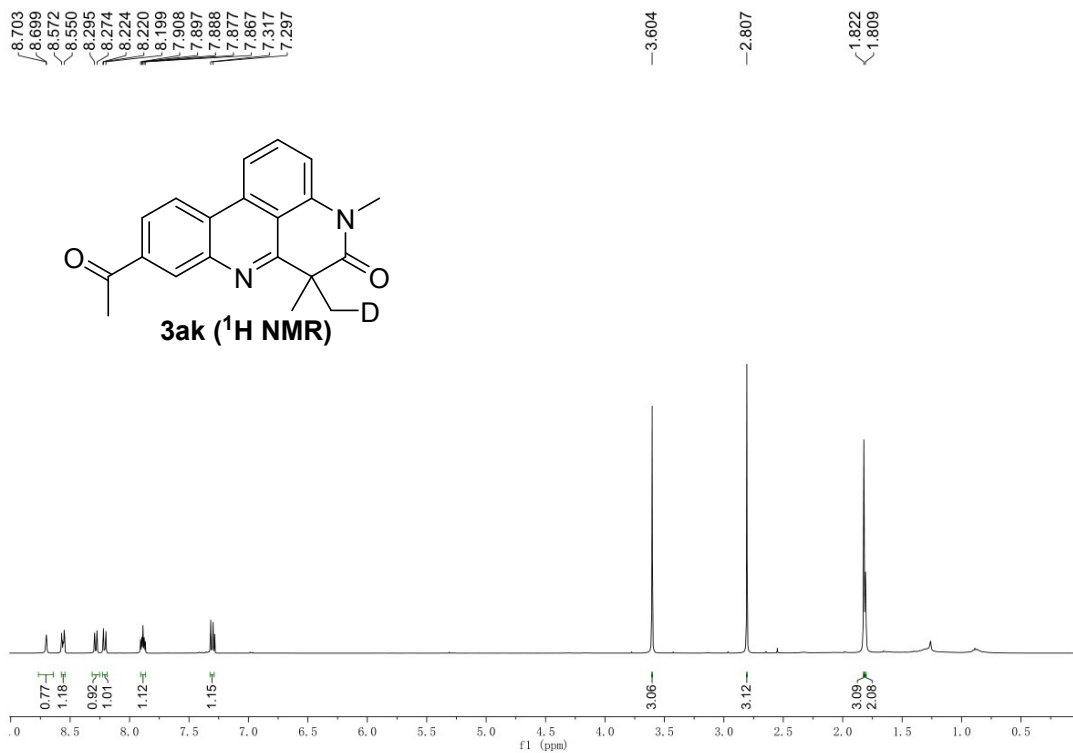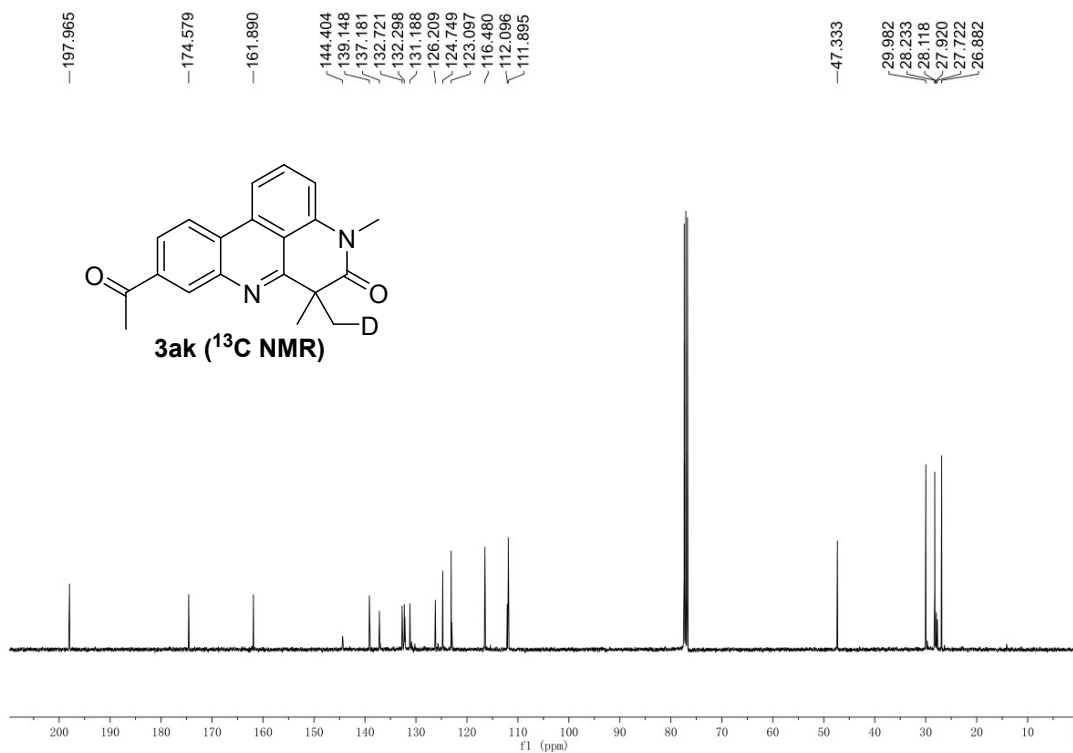

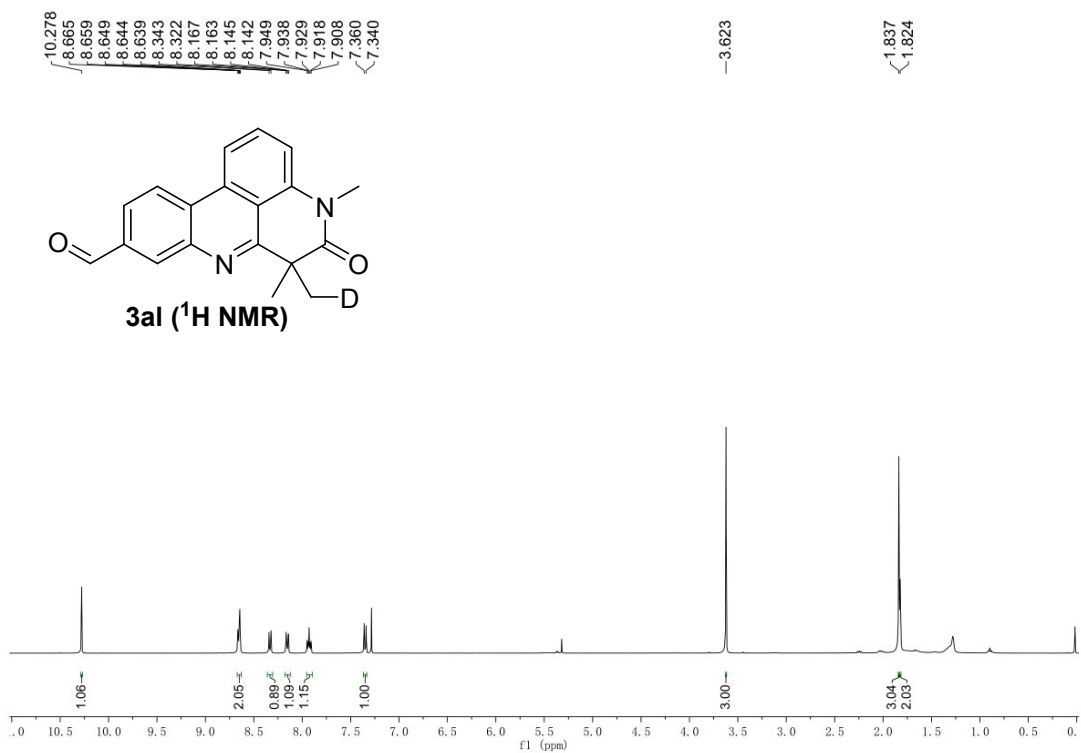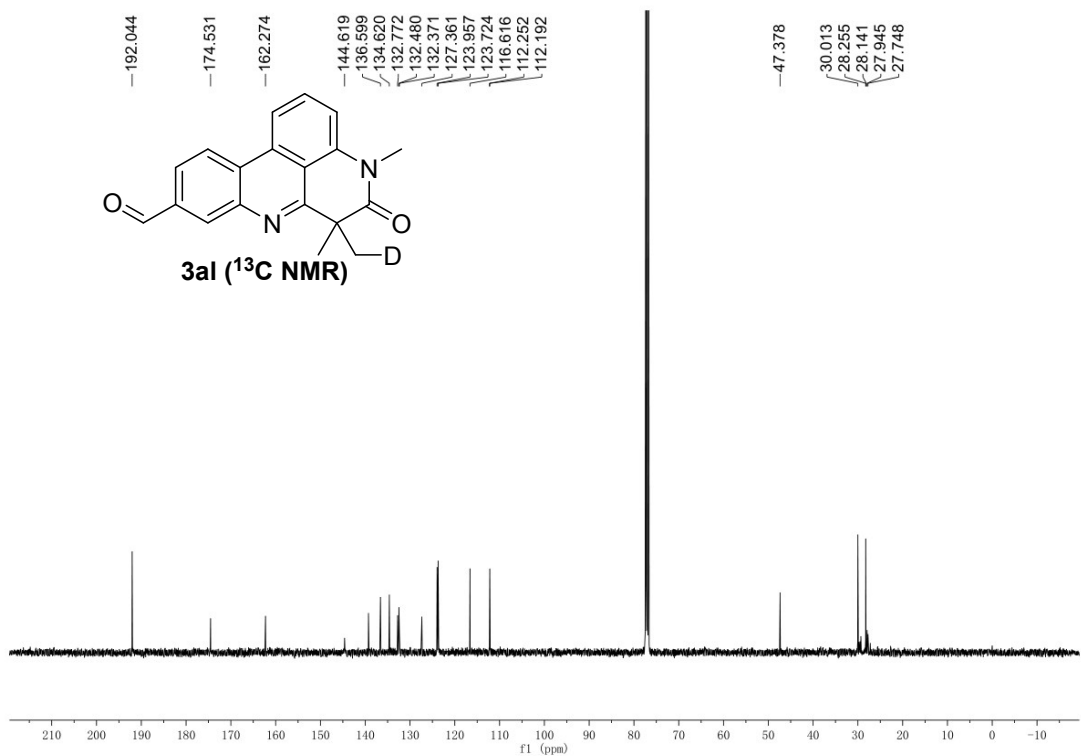

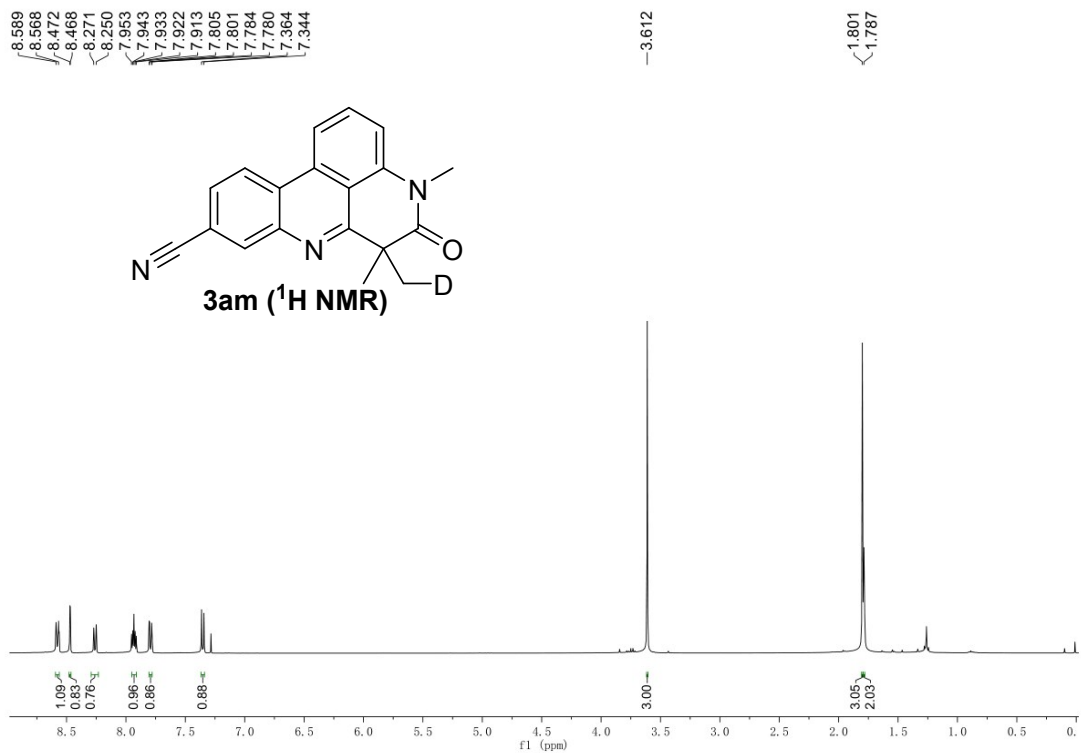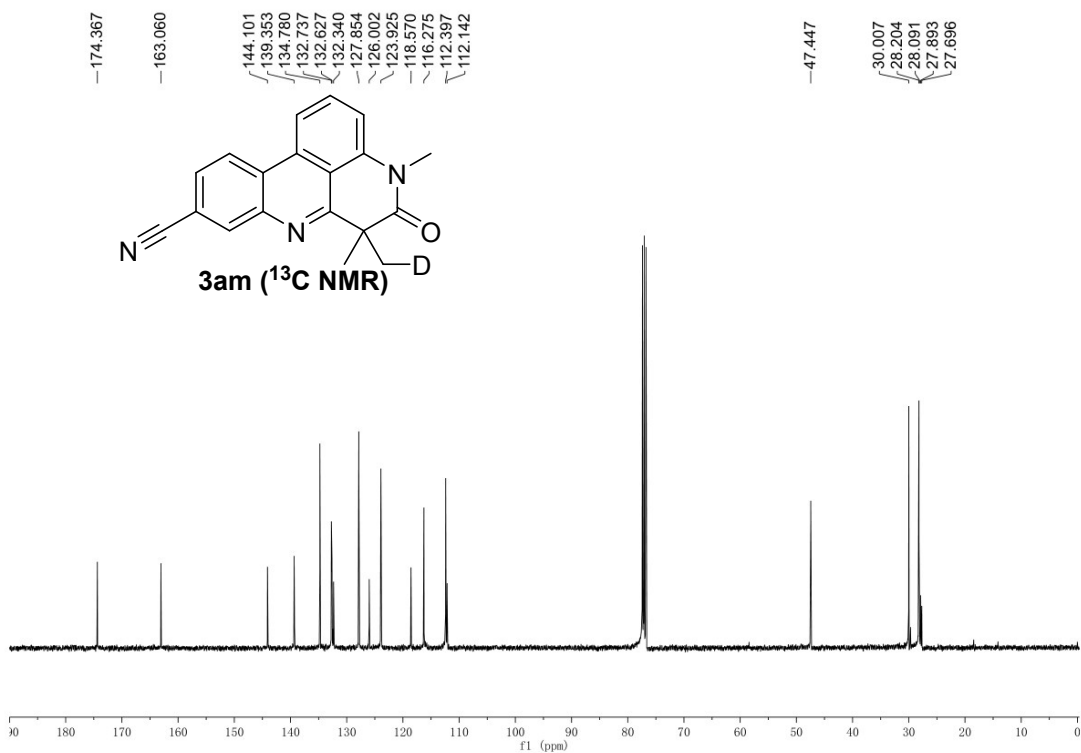



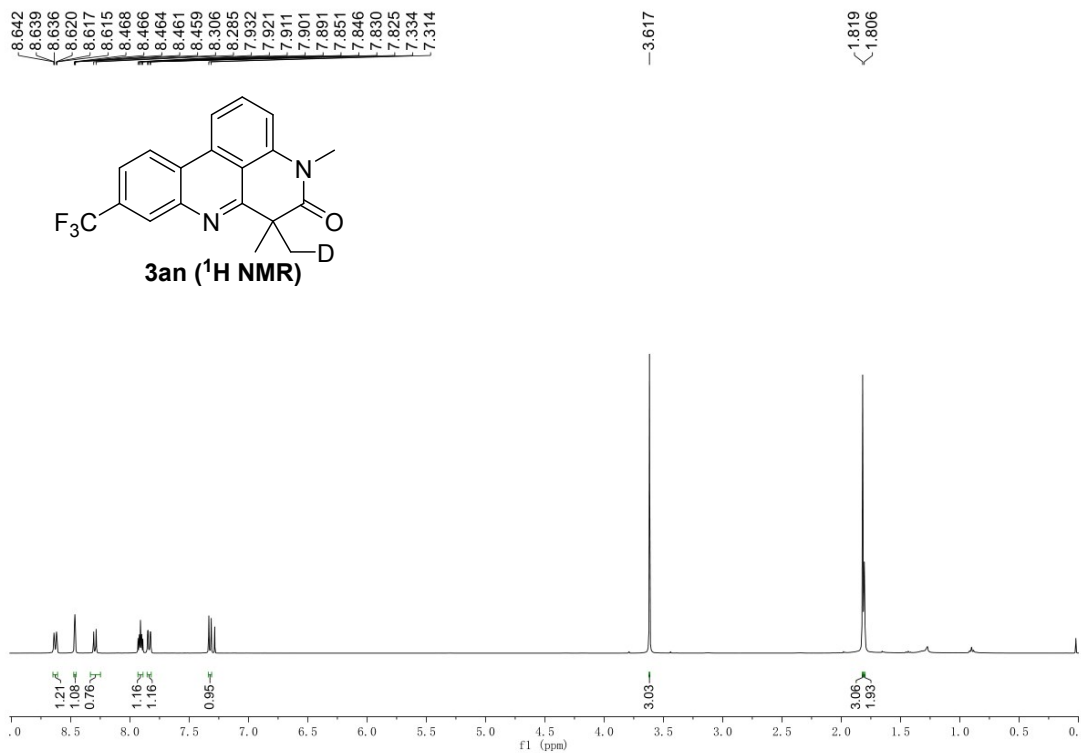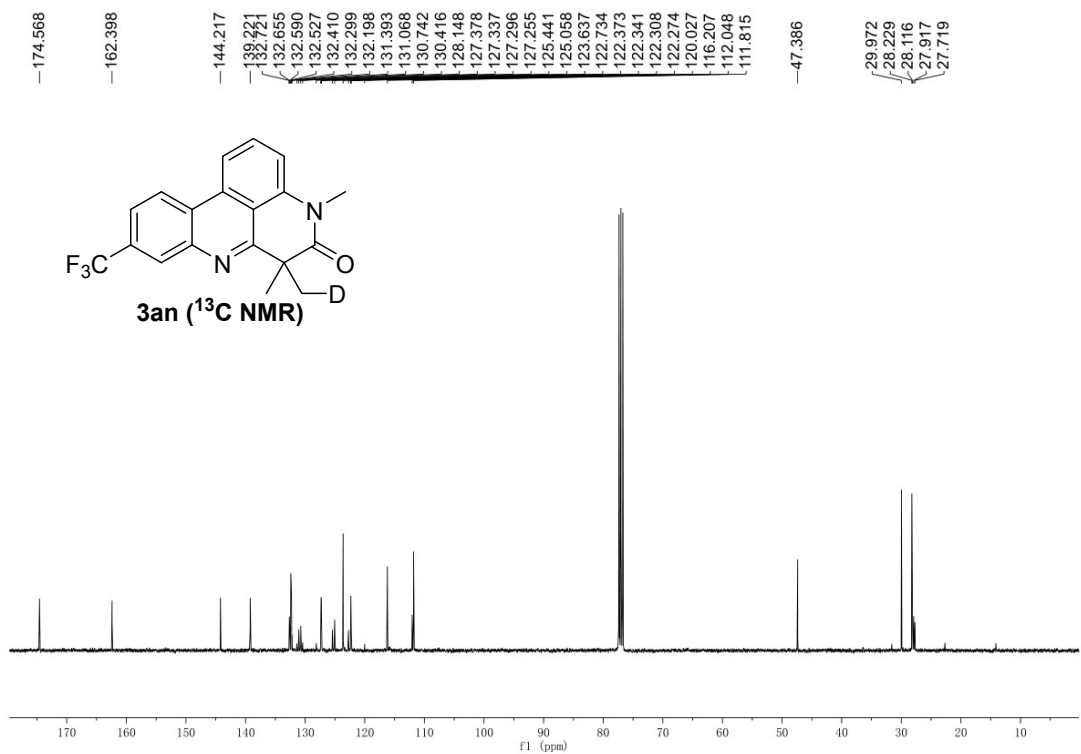

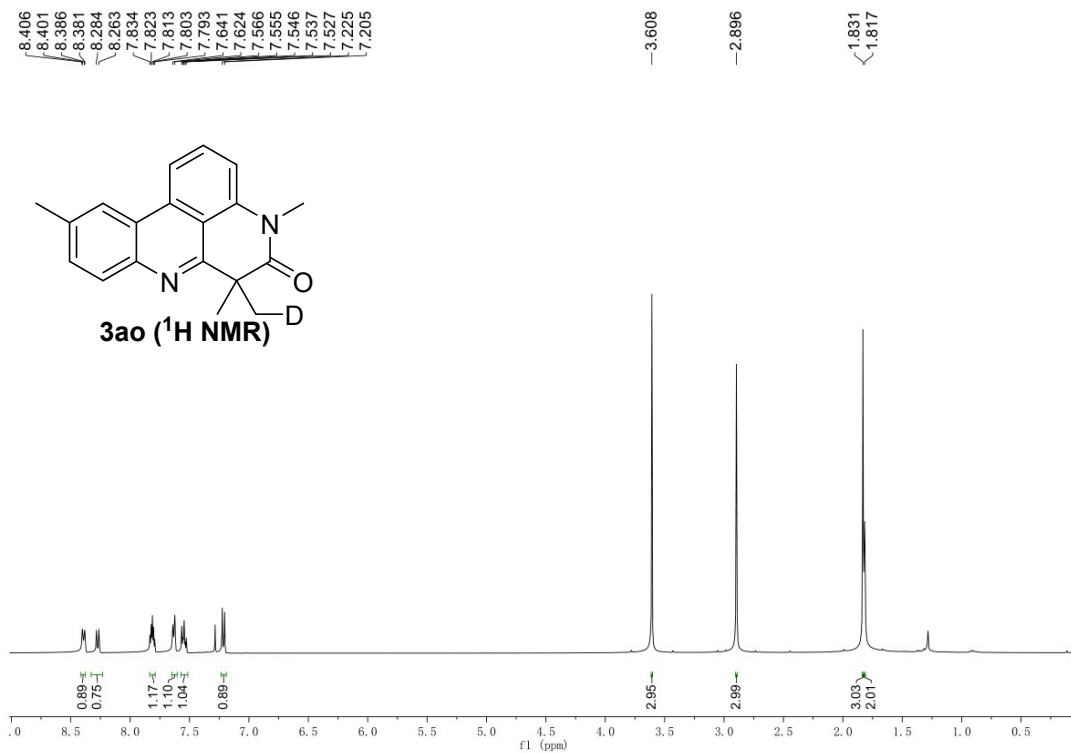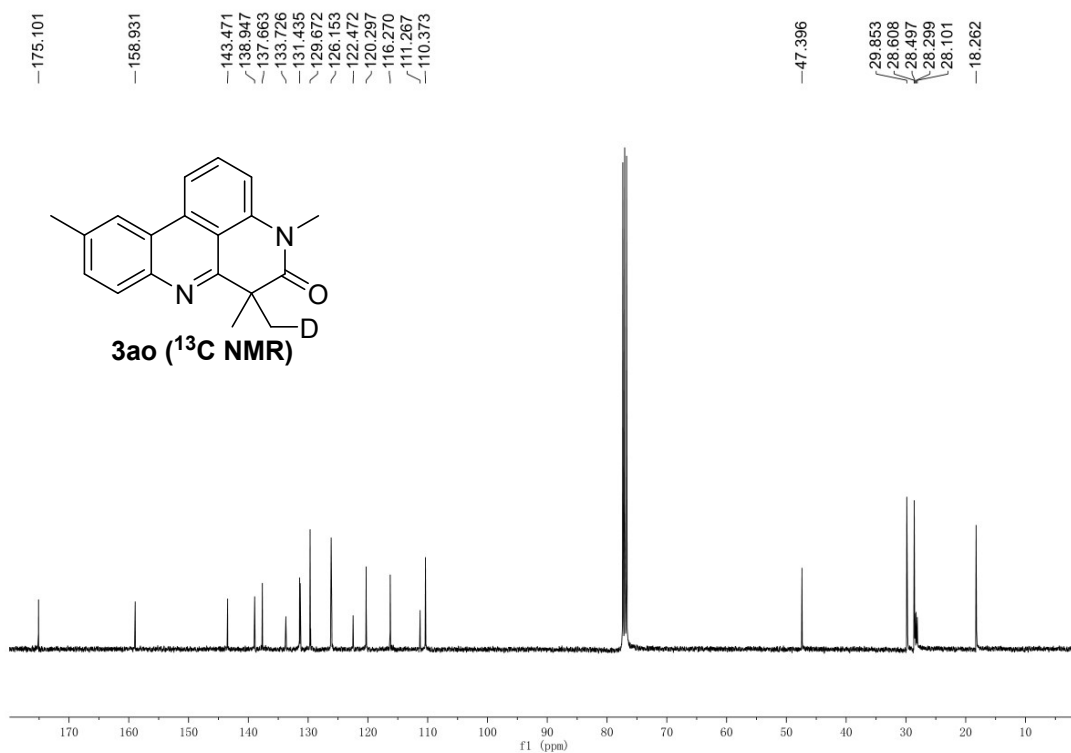

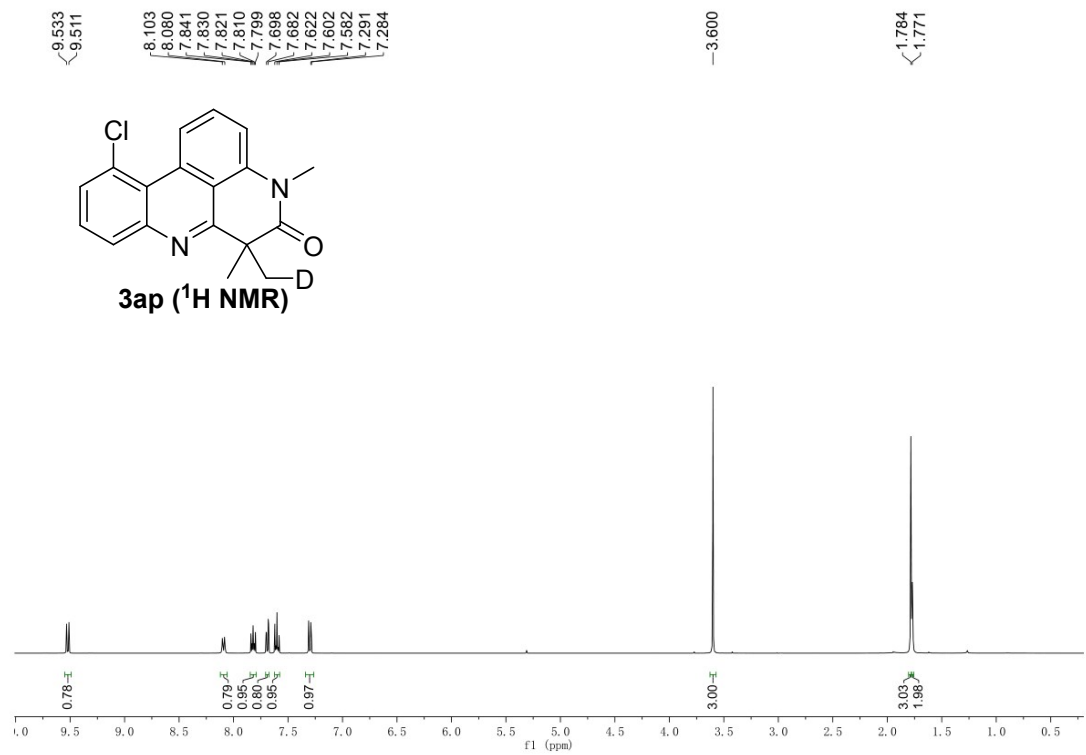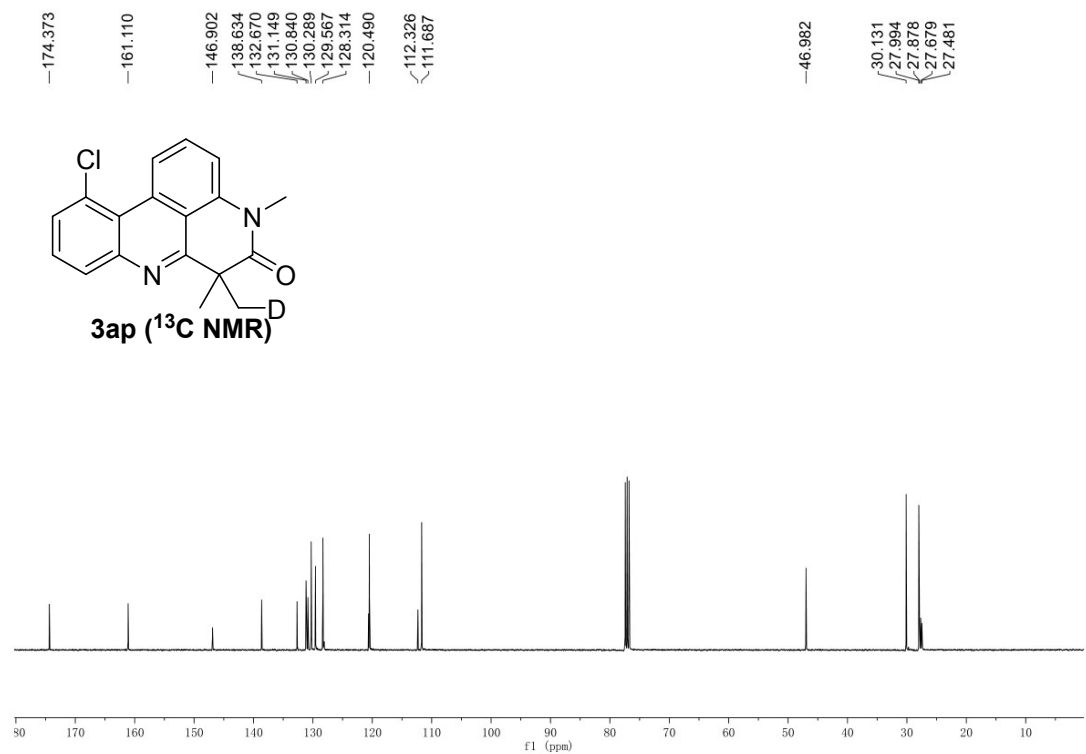

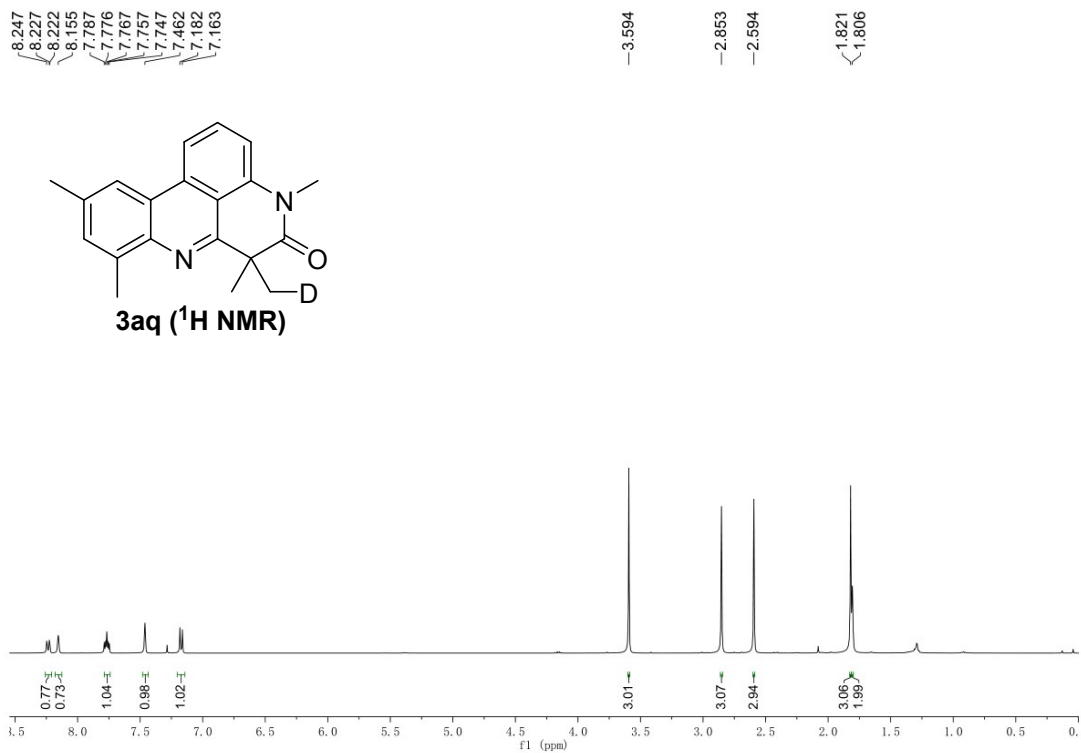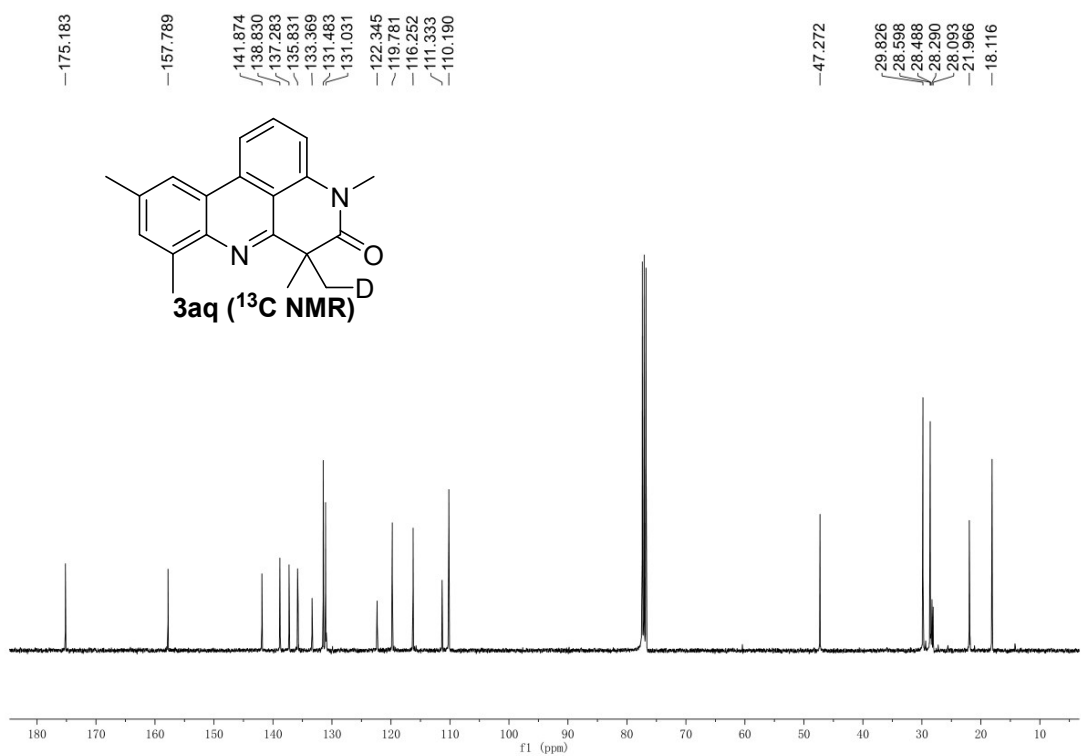

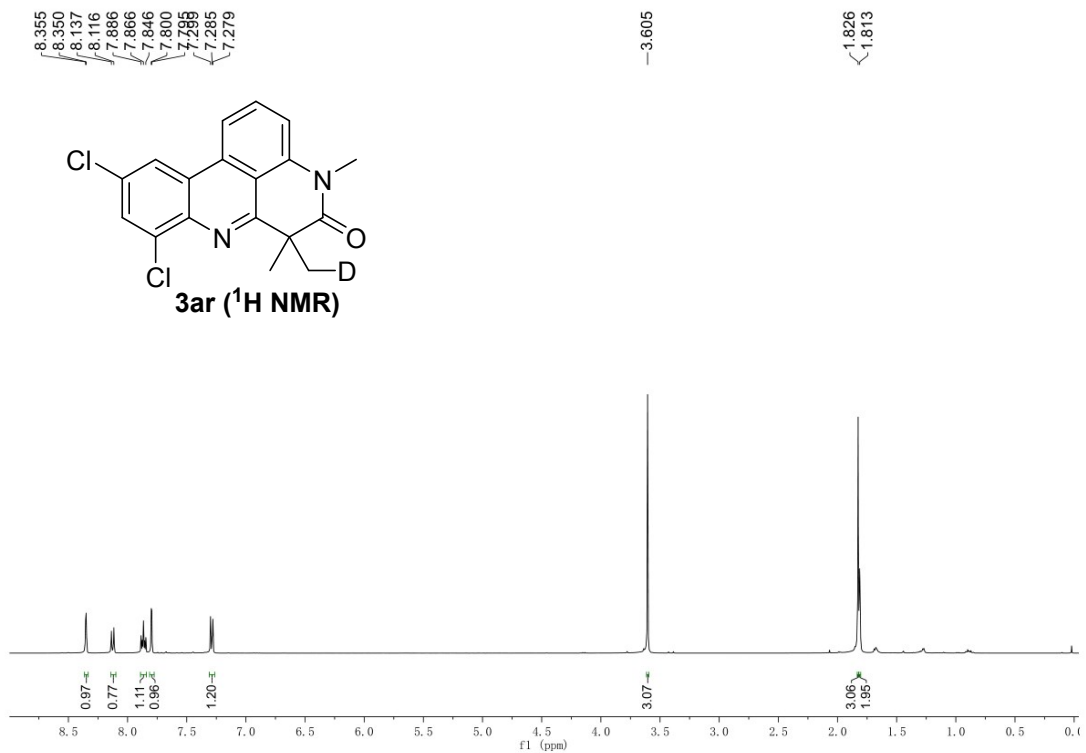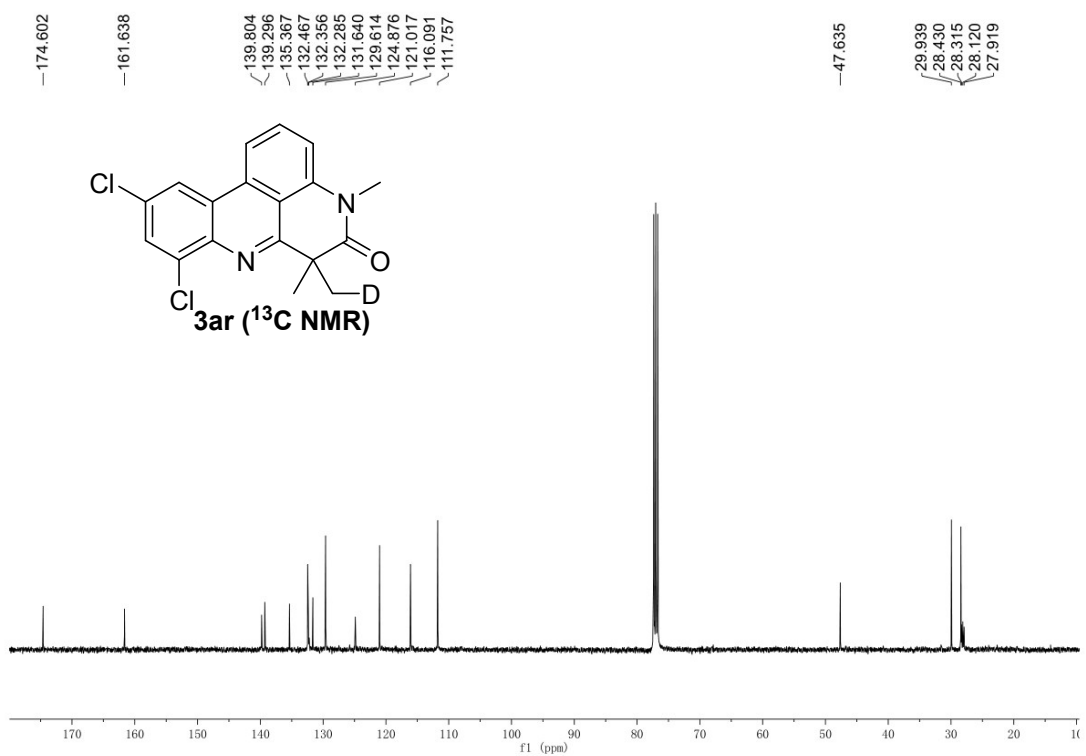

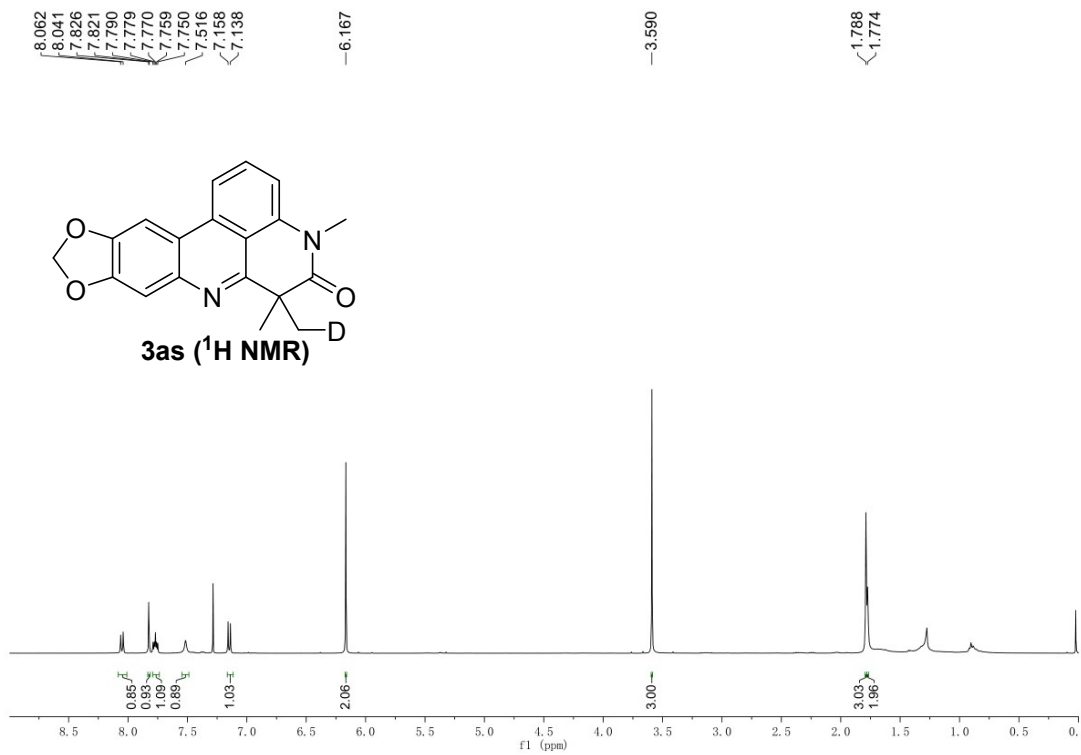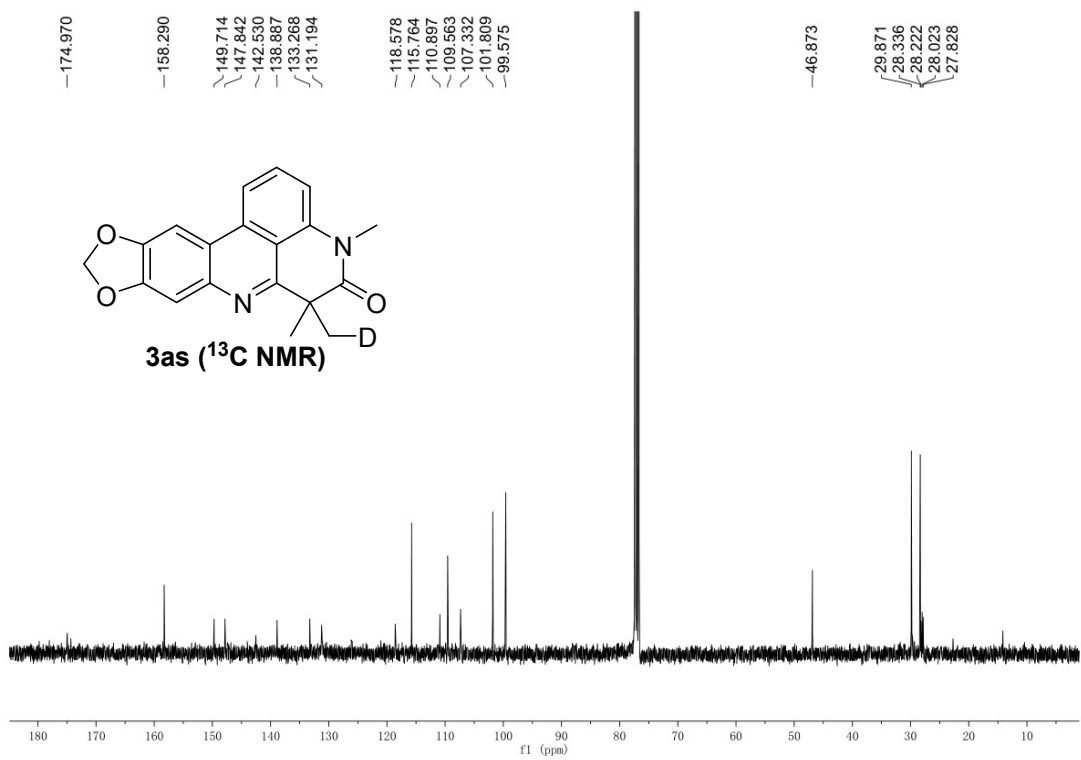

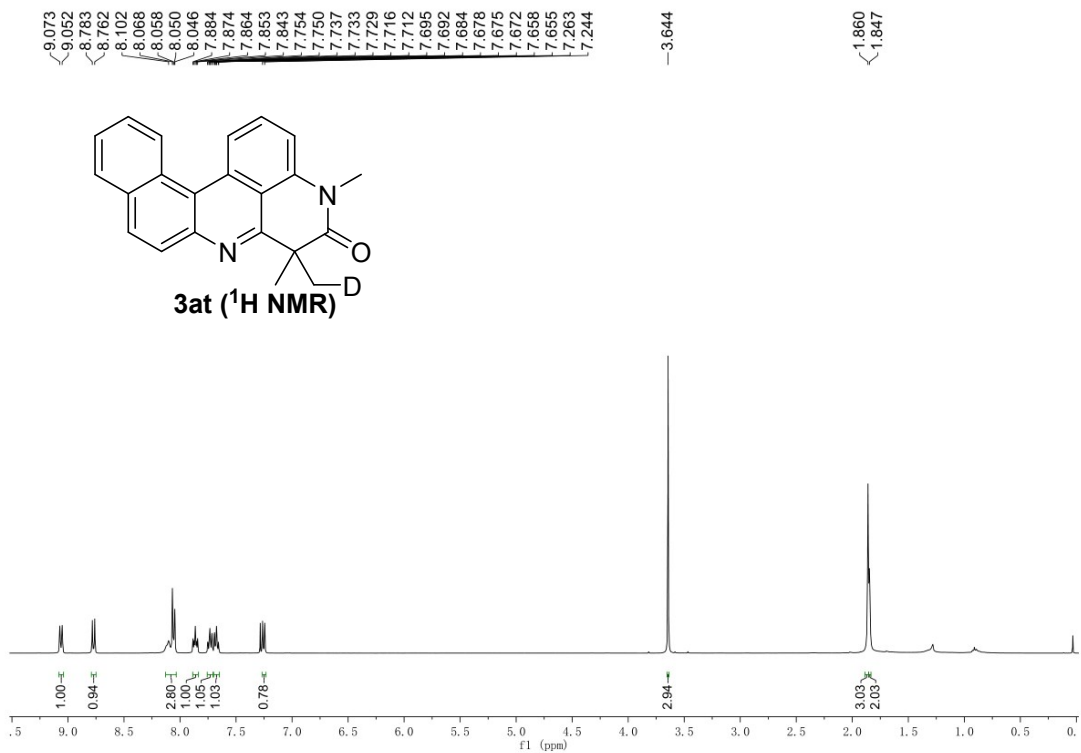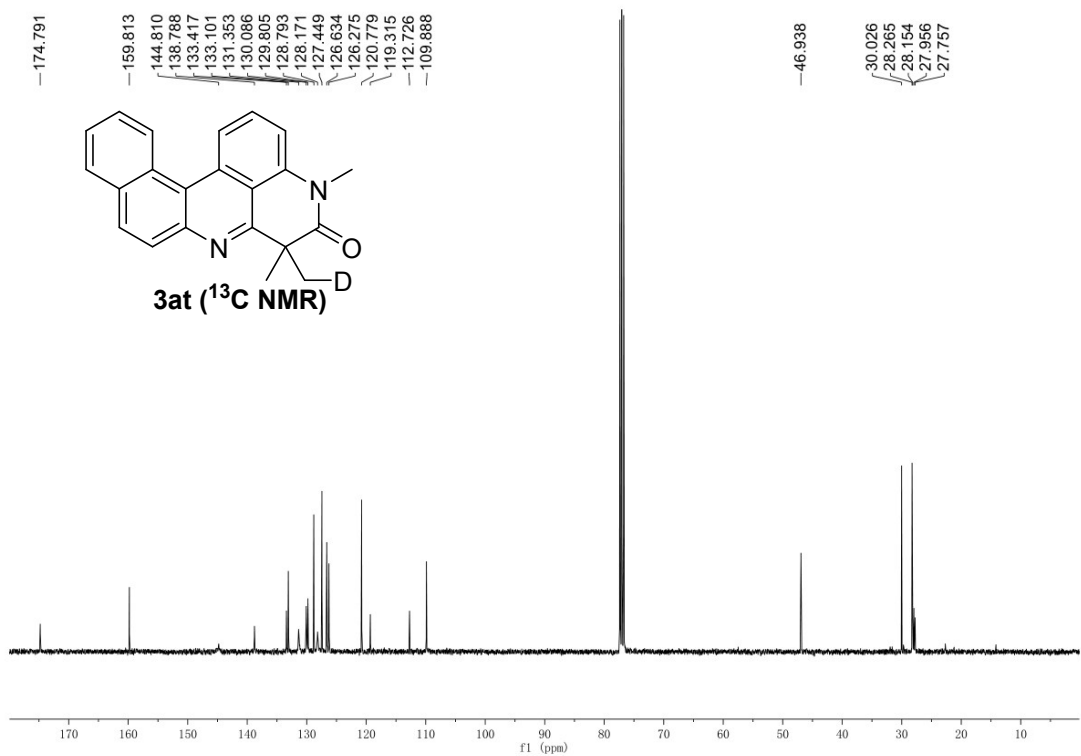

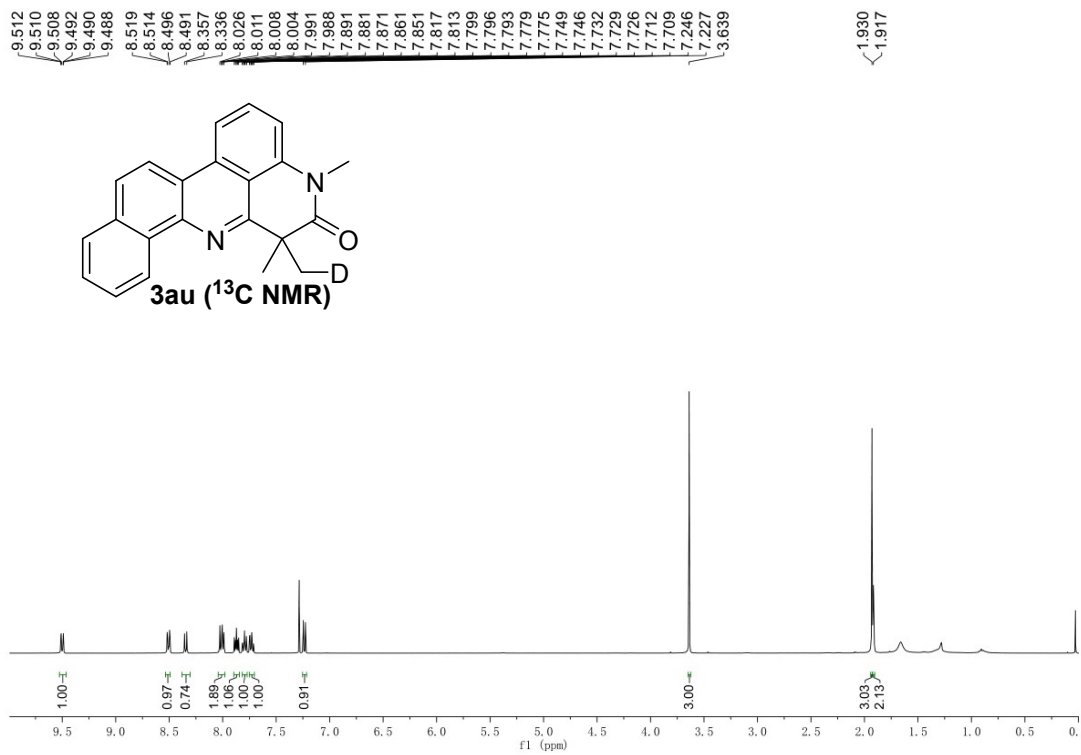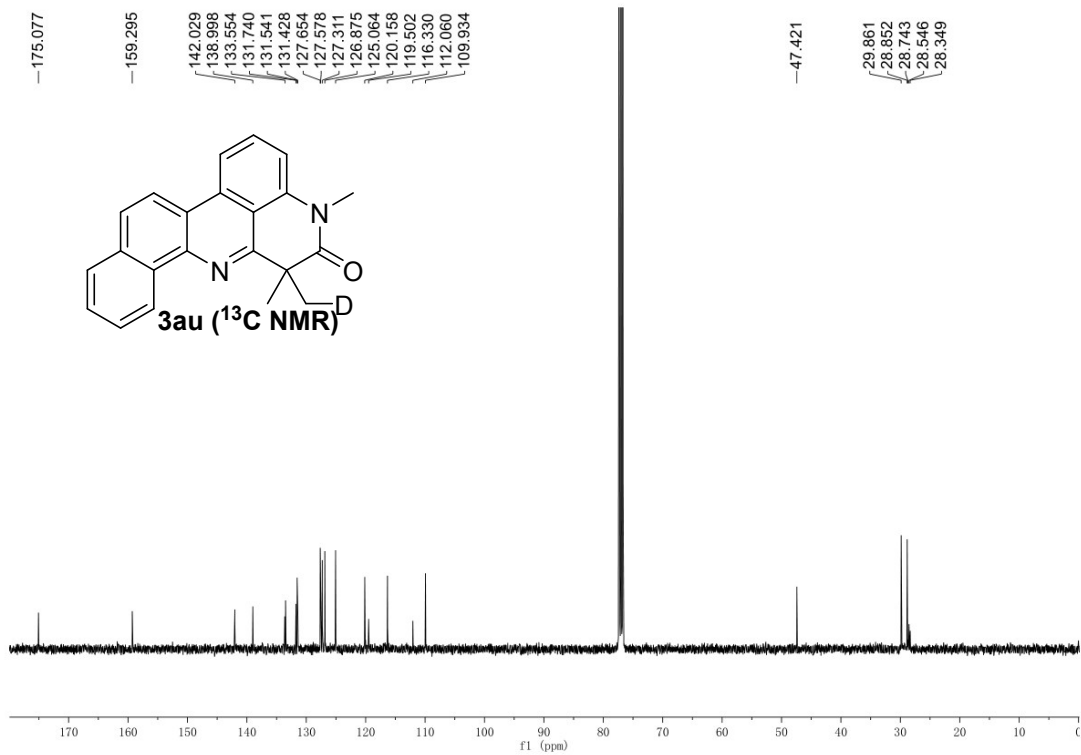



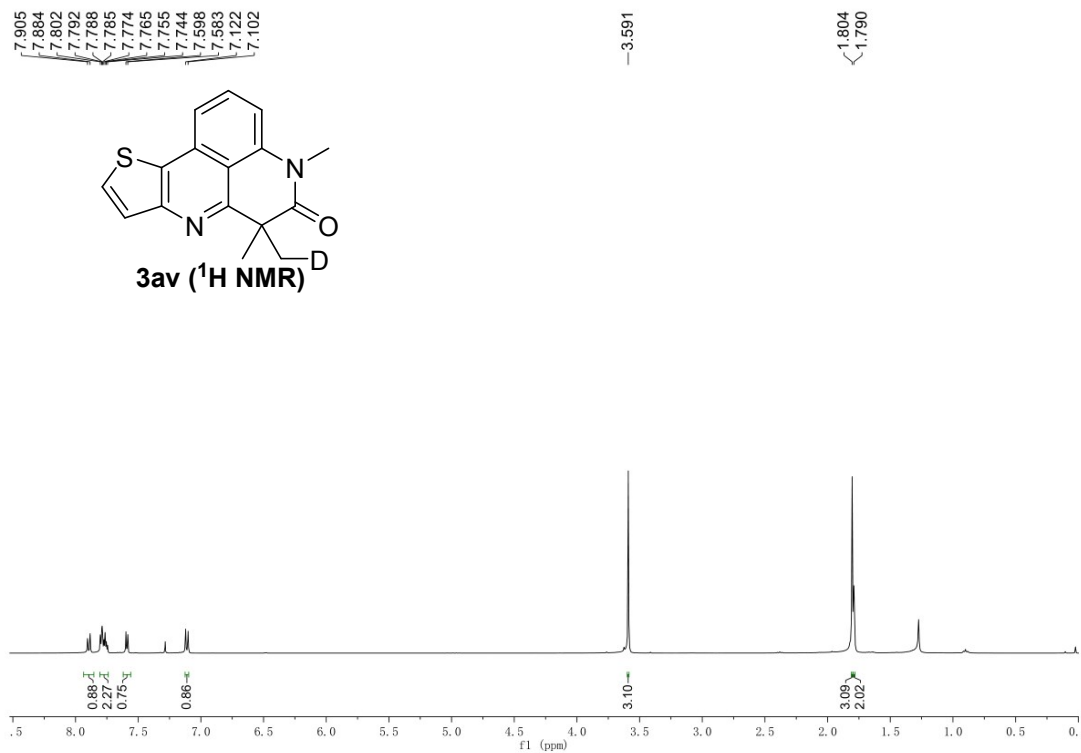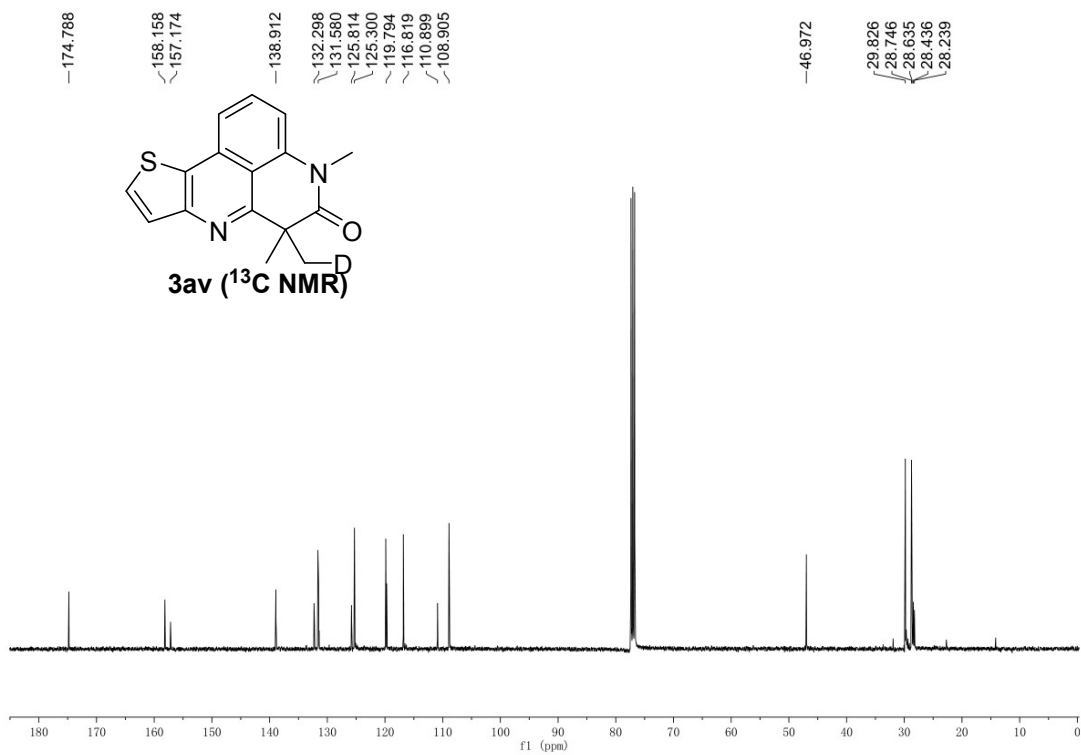

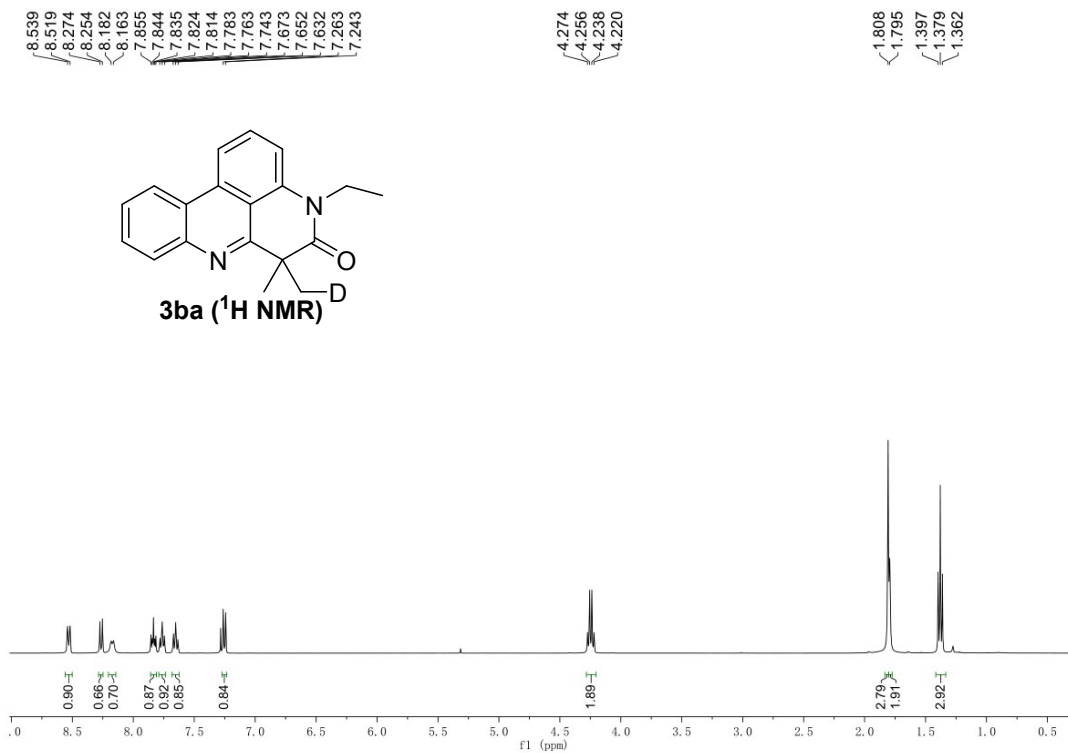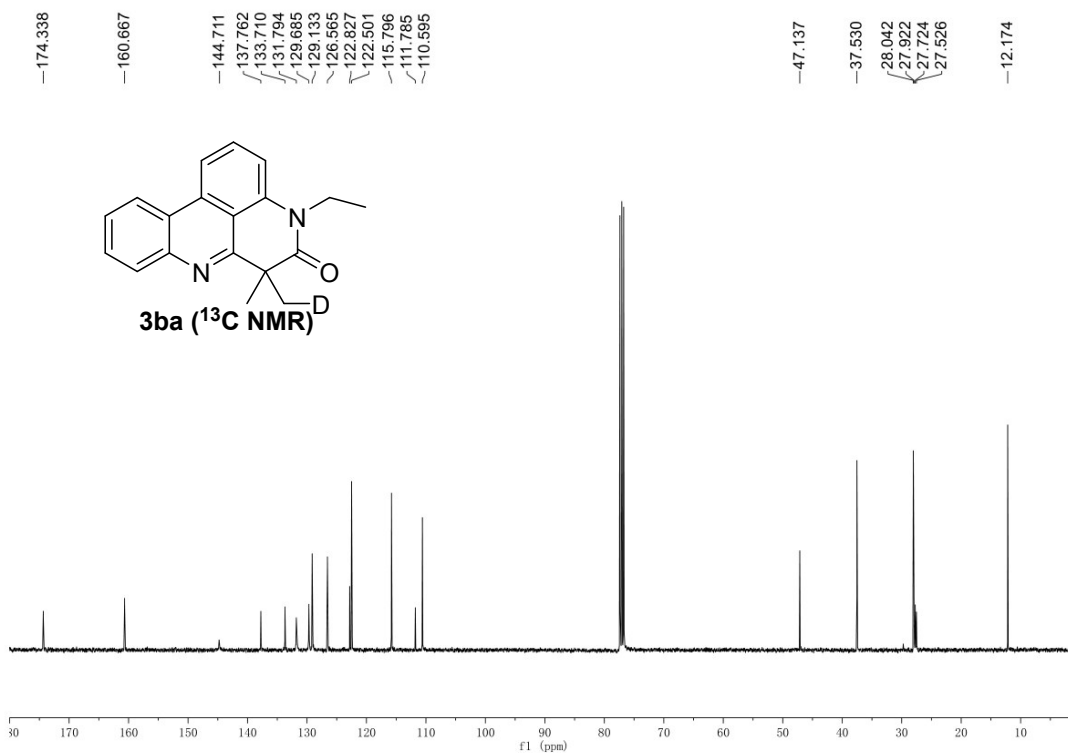

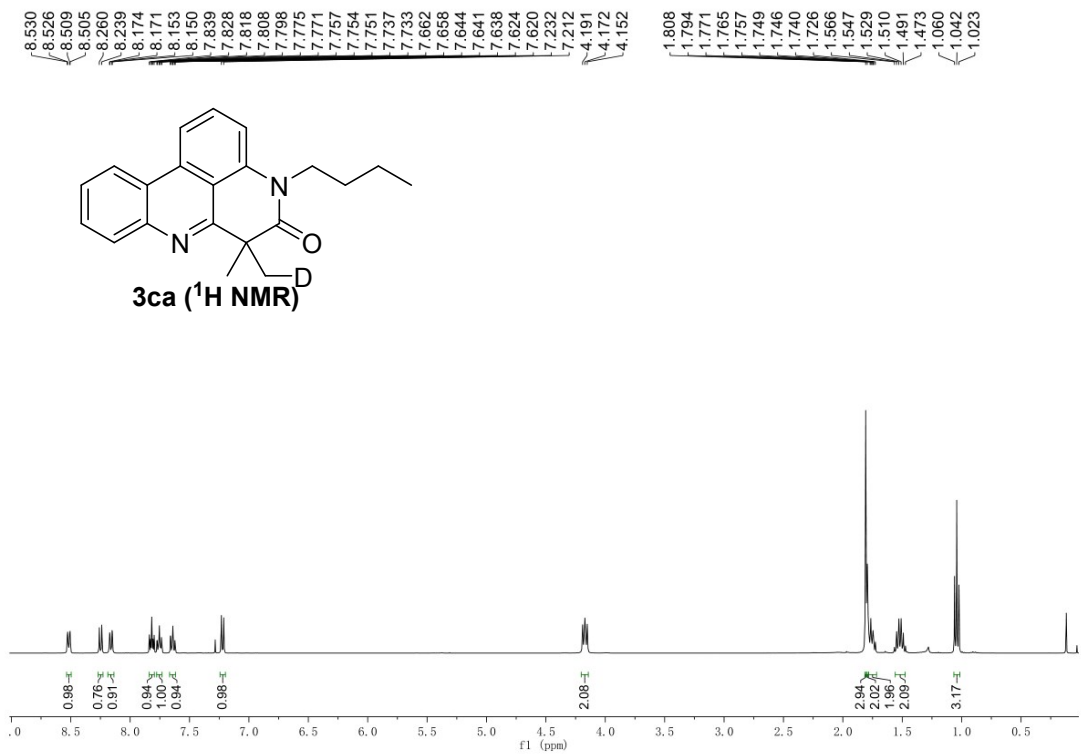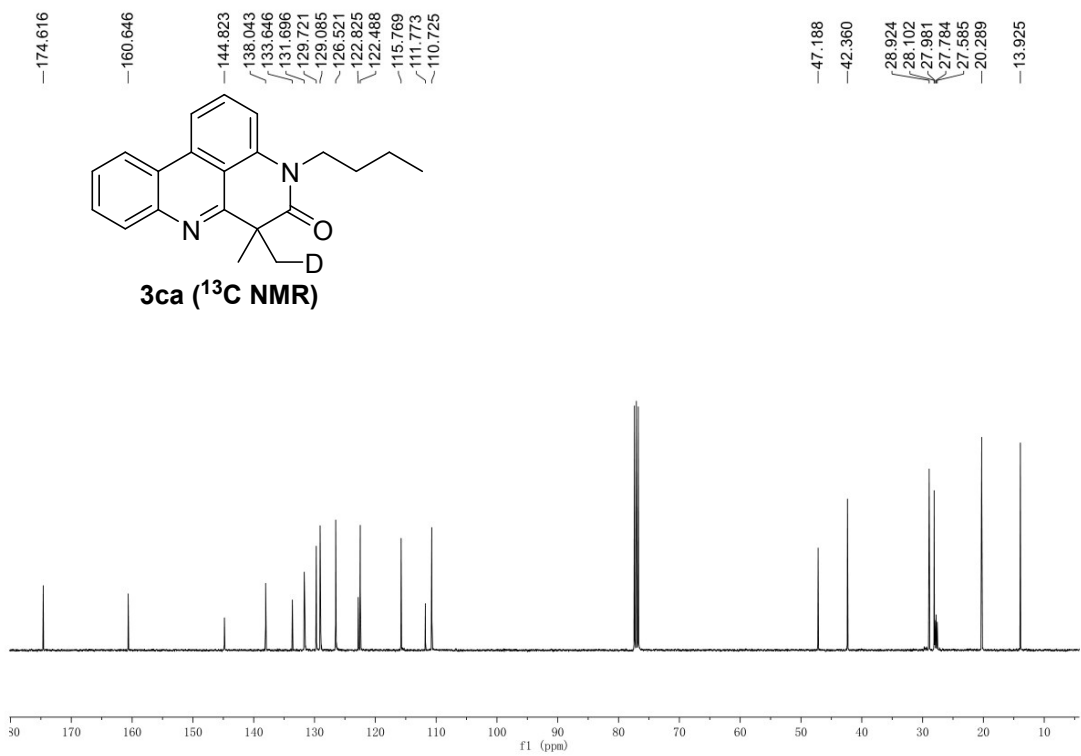

Supplement: d0ob01178a1.pdf [file d0ob01178a1.pdf]
